# Supplementary material
Source: bioRxiv or medRxiv preprint supplement (https://www.biorxiv.org/highwire/filestream/79018/field_highwire_adjunct_files/0/100677-1.pdf)
Supplement: Supplementary file [file 100677-1.pdf]

Sinusoidal voltage protocols for rapid characterisation  
of ion channel kinetics:  
Appendix

Kylie A. Beattie, Adam P. Hill, Rémi Bardenet, Yi Cui, Jamie I. Vandenberg,  
David J. Gavaghan, Teun P. de Boer, Gary R. Mirams

January 31, 2018

**Contents**

|          |                                                                    |           |
|----------|--------------------------------------------------------------------|-----------|
| <b>A</b> | <b>Details of Published hERG Channel Models</b>                    | <b>2</b>  |
| <b>B</b> | <b>Additional Methods</b>                                          | <b>4</b>  |
| B1       | Additional Experimental Methods . . . . .                          | 4         |
| B1.1     | Cell Culture . . . . .                                             | 4         |
| B1.2     | Electrophysiology Solutions . . . . .                              | 4         |
| B1.3     | Recording Techniques . . . . .                                     | 4         |
| B1.4     | Details of Voltage Clamp Protocols . . . . .                       | 4         |
| B1.5     | Liquid Junction Potential . . . . .                                | 6         |
| B1.6     | Effect of Dofetilide Subtraction . . . . .                         | 6         |
| B1.7     | Deriving IV Curves and Time Constant-V Curves . . . . .            | 7         |
| B2       | Bayesian Inference Scheme . . . . .                                | 8         |
| B2.1     | Likelihood formulation . . . . .                                   | 8         |
| B2.2     | Conductance estimation to inform the prior . . . . .               | 10        |
| B2.3     | Prior . . . . .                                                    | 10        |
| B2.4     | Global minimisation . . . . .                                      | 11        |
| B2.5     | Markov Chain Monte Carlo parameter inference . . . . .             | 11        |
| <b>C</b> | <b>Synthetic Data Study to Assess Protocol Information Content</b> | <b>13</b> |
| C1       | Producing synthetic data . . . . .                                 | 13        |
| C2       | Inferring parameters from synthetic data . . . . .                 | 13        |
| <b>D</b> | <b>Cell-Specific versus Literature Model Predictions</b>           | <b>14</b> |
| <b>E</b> | <b>Additional Current-Voltage Relationship Predictions</b>         | <b>18</b> |
| <b>F</b> | <b>Comparing Cell-Specific with Average Model</b>                  | <b>20</b> |
| <b>G</b> | <b>Synthetic data study for an <math>I_{Ks}</math> model</b>       | <b>26</b> |
| <b>H</b> | <b>Testing with a five state Markov model</b>                      | <b>27</b> |

# 1 A Details of Published hERG Channel Models

2 Figure 1 of the main text features simulations from 29 literature hERG or  $I_{Kr}$  models. In Table A1  
 3 we list these models, give references, and show the seven different structures that they feature in  
 4 Figure A1.

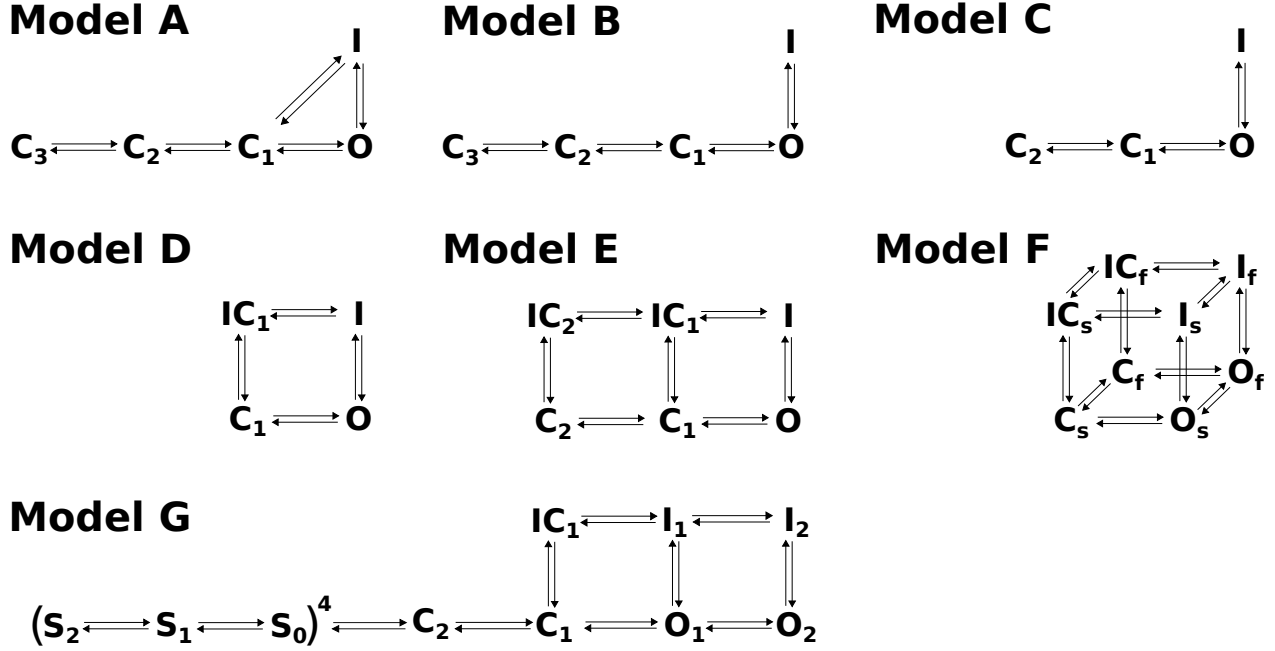

Figure A1: Different mathematical model structures for the literature models listed in Table A1. The model we use in the main text takes structure D as shown in Figure 4B. Note that, depending on their parameterisations, models D, E, F and G could satisfy independent gating (Hodgkin-Huxley assumptions) and then the states annotated as ‘I’ could also be considered ‘IO’ — but as drawn here this is not a requirement, and in neither case does current flow, so we removed the ‘O’ from these for simplicity.

5 There are two models in this table that are not in Figure 1: the Kiehn et al. (1999) model as it  
 6 is defined only at certain voltages; and the Piper et al. (2003) model as it does not easily fit into  
 7 the Hodgkin-Huxley/Markov model framework we used in our simulation code.

Table A1: Table summarising details of each published  $I_{Kr}$  model formulation, in chronological order. ‘# Params’ indicates the total number of free parameters (the number given includes a  $G_{Kr}$  parameter for the conductance). The *Model Type* is ‘HH’ for Hodgkin–Huxley models and ‘MM’ for Markov Models, or a hybrid of the two (MM/HH, which generally means a MM with some symmetry in transition rates). *Temp.* represents temperature and is given as ‘Room’ for room temperature or ‘PT’ for physiological temperature. *Structure* represents the model structure as shown in Figure A1. We see that models are calibrated to experimental datasets from different conditions — species, cell types and temperatures. These conditions may not be the same temperature, cell type or even species as the models are intended to represent (see Niederer et al., 2009), and so the final column indicates the species of the cell model in which the hERG model was used.

| Model                         | Model Type | # Params | Experimental Calibration Data Species and Cell Type(s)                        | Conditions Temp. | Structure | Model for Species |
|-------------------------------|------------|----------|-------------------------------------------------------------------------------|------------------|-----------|-------------------|
| Zeng et al. (1995)            | HH         | 11       | Guinea pig ventricular myocytes                                               | PT               | D         | Guinea pig        |
| Lindblad et al. (1996)        | HH         | 11       | Rabbit SA, AV, atrial myocytes and rabbit and guinea pig ventricular myocytes | PT               | D         | Rabbit            |
| Liu et al. (1996)             | MM         | 11       | Ferret atrial myocytes                                                        | Room             | C         | Ferret            |
| Wang et al. (1997)            | MM         | 15       | <i>Xenopus</i> oocytes                                                        | Room             | B         | N/A               |
| Courtemanche et al. (1998)    | HH         | 10       | Human atrial myocytes                                                         | PT               | D         | Human             |
| Nygren et al. (1998)          | HH         | 9        | Human atrial/rabbit atrial myocytes and <i>Xenopus</i> oocytes                | PT               | D         | Human             |
| Priebe and Beuckelmann (1998) | HH         | 9        | Human ventricular myocytes                                                    | PT               | D         | Human             |
| Kiehn et al. (1999)           | MM         | 9*       | <i>Xenopus</i> oocytes                                                        | Room             | A         | N/A               |
| Winslow et al. (1999)         | HH         | 7        | Guinea pig ventricular myocytes                                               | PT               | D         | Dog               |
| Ramirez et al. (2000)         | HH         | 13       | Canine atrial myocytes                                                        | PT               | D         | Dog               |
| Zhang et al. (2000)           | HH         | 15       | Rabbit sino-atrial node                                                       | PT               | F         | Rabbit            |
| Clancy and Rudy (2001)        | MM         | 14       | Guinea pig ventricular                                                        | PT               | A         | Guinea pig        |
| Lu et al. (2001)              | MM         | 17       | Chinese Hamster Ovary (CHO)                                                   | PT               | A         | N/A               |
| Mazhari et al. (2001)         | MM         | 17       | Human Embryonic Kidney (HEK) 293                                              | PT               | A         | N/A               |
| Fox et al. (2002)             | HH         | 10       | Canine ventricular myocytes                                                   | PT               | D         | Dog               |
| Kurata et al. (2002)          | HH         | 18       | Rabbit sino-atrial node                                                       | PT               | F         | Rabbit            |
| Oehmen et al. (2002)          | MM         | 11       | Rabbit sino-atrial node                                                       | PT               | C         | Rabbit            |
| Matsuoka et al. (2003)        | HH         | 23       | Rabbit sino-atrial node and guinea pig ventricular myocytes                   | PT               | F         | Guinea pig        |
| Piper et al. (2003)           | MM/HH      | 43       | <i>Xenopus</i> oocytes                                                        | Room             | G         | N/A               |
| Seemann et al. (2003)         | HH         | 7        | Human ventricular myocytes                                                    | PT               | D         | Human             |
| Hund and Rudy (2004)          | HH         | 11       | Canine ventricular myocytes                                                   | PT               | D         | Dog               |
| Shannon et al. (2004)         | HH         | 11       | Rabbit ventricular myocytes                                                   | PT               | D         | Rabbit            |
| Ten Tusscher et al. (2004)    | HH         | 13       | HEK 293/CHO/ <i>Xenopus</i> oocytes                                           | PT               | D         | Human             |
| Fink et al. (2008)            | MM         | 15       | Human Embryonic Kidney (HEK) 293                                              | PT               | B         | Human             |
| Aslanidi et al. (2009)        | HH         | 8        | Canine Purkinje                                                               | PT               | D         | Dog               |
| Inada et al. (2009)           | HH         | 20       | Rabbit atrio-ventricular node                                                 | PT               | F         | Rabbit            |
| Grandi et al. (2010)          | HH         | 12       | Human ventricular myocytes                                                    | PT               | D         | Human             |
| O’Hara et al. (2011)          | HH         | 19       | Human ventricular myocytes                                                    | PT               | F         | Human             |
| Severi et al. (2012)          | HH         | 17       | Rabbit sino-atrial node                                                       | PT               | F         | Rabbit            |
| Di Veroli et al. (2013)       | MM/HH      | 13       | Chinese Hamster Ovary (CHO)                                                   | Room             | E         | N/A               |
| Di Veroli et al. (2013)       | HH         | 17       | Human Embryonic Kidney (HEK) 293 expressing canine ERG                        | PT               | D         | N/A               |

\* The transition rates of the Kiehn et al. (1999) model are defined at specific voltages, so for this model there are 8 parameters (and 1 conductance parameter) for each voltage at which the model is defined.

## 8 B Additional Methods

9 This section contains further description of the methods that were used, with a particular focus on  
10 details of the Bayesian Inference scheme in Section B2. These sections do not feature in the main  
11 Methods section due to space constraints.

### 12 B1 Additional Experimental Methods

#### 13 B1.1 Cell Culture

14 Chinese Hamster Ovary (CHO) cells stably expressing Kv11.1 were used in the patch clamp experi-  
15 ments performed in this study. Cells were cultured in Ham’s F12 nutrient mix containing 5% foetal  
16 bovine serum and maintained at 37°C with 5% CO<sub>2</sub>.

#### 17 B1.2 Electrophysiology Solutions

18 The bath solution was composed of: NaCl (137 mM), KCl (4 mM), MgCl<sub>2</sub> (1 mM), HEPES (10 mM),  
19 glucose (10 mM), and CaCl<sub>2</sub> (1.8 mM). The pH of the solution was adjusted to 7.4 with NaOH.  
20 Borosilicate glass micropipettes were pulled and fire polished to final tip resistances of approxi-  
21 mately 2–5 MΩ when filled with pipette solution containing: KCl (130 mM), MgCl<sub>2</sub> (1 mM), HEPES  
22 (10 mM), EGTA (5 mM), and MgATP (5 mM). pH of the solution was adjusted to 7.2 with KOH.  
23 All experiments were performed at room temperature (21–22°C). Using this temperature and the  
24 composition of the bath and pipette solutions, a K<sup>+</sup> reversal potential of approximately -88.4 mV  
25 was calculated using the Nernst potential (equation (8)), the exact value depending on the particular  
26 temperature of each experimental recording.

#### 27 B1.3 Recording Techniques

28 Current recordings were made using an Axopatch 200B amplifier in whole-cell patch clamp mode.  
29 Data acquisition was performed using pClamp 10 software (Molecular Devices, Sunnyvale, USA).  
30 The protocols were first created as text files and then converted to `.abf` stimulus files to make  
31 corresponding `.pro` protocol files in the pClamp 10 software. A CV 203BU amplifier headstage  
32 and a Digidata 1440A were used. A Sutter MP225 micromanipulator was used for positioning of  
33 the microelectrode. The current signal was sampled at a rate of 10 kHz. 75–80% series resistance  
34 compensation was applied and data were 5 kHz low pass Bessel filtered by the hardware. No  
35 software filtering was applied. Whole-cell capacitance compensation was applied electronically.  
36 Leak subtraction was applied offline by using a 50 ms leak step to allow correction. To make a series  
37 of successive recordings using different protocols on the same cell, the pClamp “Sequencing Keys”  
38 tool was utilised, with a `.sks` file detailing the sequence the protocols should be performed in.

#### 39 B1.4 Details of Voltage Clamp Protocols

40 Here we list the details of the voltage-clamp protocols that were not included in the main text. The  
41 protocols can also be found encoded in the software, available to download as described at the end  
42 of the main text.

#### 43 Protocol 0 — Repeated activation step

44 Before the start of each set of recordings on each cell an activation step protocol with a start-to-  
45 start interval of 12 seconds was repeated several times until consistent currents were observed on

46 each repeat. From an initial holding potential of  $-80$  mV, this protocol comprised a 5 s step to  
 47  $10$  mV followed by a 5 s step to  $-50$  mV before returning again to a holding potential of  $-80$  mV.  
 48 This protocol is depicted in Figure B2. We repeated this protocol while dofetilide was added (see  
 49 Figure 2) and the current traces recorded from this protocol were used to assess when a steady level  
 50 of dofetilide block had been reached.

### 51 Protocols 1,2 — Activation Kinetics

52 After the initial period at holding potential incorporating the  $-120$  mV leak step, a step to  $V_{step1}$   
 53 followed and was held at that voltage for  $T_{step}$  ms, before a step to  $-120$  mV for 2.5 s, before  
 54 returning to holding potential of  $-80$  mV for 1 second. The protocol was repeated 6 times with a  
 55 different  $T_{step}$  on each repeat.  $T_{step}$  took the values of 3, 10, 30, 100, 300 and 1000 ms.

- 56 • For Protocol 1,  $V_{step1}$  is 0 mV. This protocol is depicted in Figure B3.
- 57 • For Protocol 2,  $V_{step1}$  is  $+40$  mV. This protocol is depicted in Figure B4.

58 Figures B2–B4 show plots of the voltage clamps that are used in the repeated activation step  
 59 and activation kinetics protocols (Pr0–Pr2).

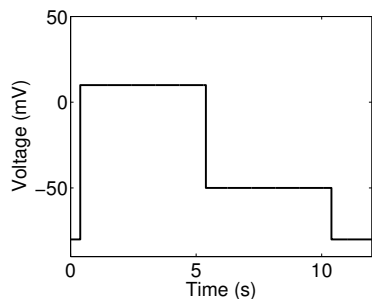

Figure B2: Repeated Activation Step Protocol (Pr0).

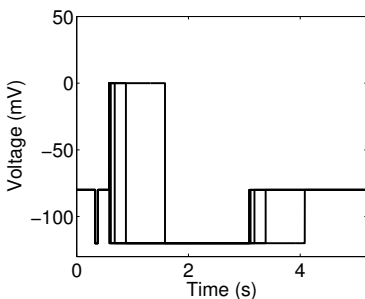

Figure B3: Activation Kinetics 1 Protocol (Pr1).

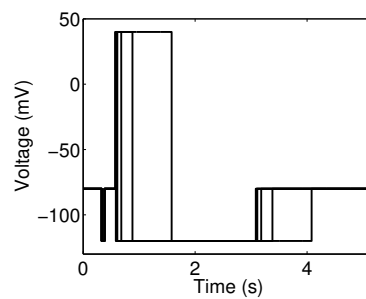

Figure B4: Activation Kinetics 2 Protocol (Pr2).

### 60 Protocol 3 — Steady-State Activation

61 From the initial period at holding potential incorporating the  $-120$  mV leak step, a step to  $V_{step}$   
 62 was applied for 5 seconds, followed by a 1 s step to  $-40$  mV, before a 500 ms step to  $-120$  mV, and  
 63 then returning back to holding potential for one second. This process was repeated 7 times with a  
 64 different  $V_{step}$  on each repeat.  $V_{step}$  ranged from  $-60$  mV to  $+60$  mV in 20 mV increments. This  
 65 protocol is depicted in Figure 5A (left column).

### 66 Protocol 4 — Inactivation

67 From the initial period at holding potential incorporating the  $-120$  mV leak step, a step to  $50$  mV  
 68 for 600 ms, and a step to  $-90$  mV for 60 ms, followed by a step to  $V_{step}$  for 150 ms, before a 500 ms  
 69 step to  $-120$  mV, and a 1 s step back to holding potential of  $-80$  mV; This was repeated 16 times  
 70 with a different  $V_{step}$  on each repeat.  $V_{step}$  ranged from  $-100$  mV to  $50$  mV in 10 mV increments.  
 71 This protocol is depicted in Figure 5A (middle column).

## 72 **Protocol 5 — Deactivation**

73 From the initial period at holding potential incorporating the  $-120$  mV leak step, a step to  $50$  mV  
74 for  $2$  s was applied, followed by a step to  $V_{step}$  for  $6$  s, before a  $500$  ms step to  $-120$  mV, and then  
75 returning back to holding potential for one second. This process was repeated  $9$  times with a  
76 different  $V_{step}$  on each repeat.  $V_{step}$  ranged from  $-120$  mV to  $-40$  mV in  $10$  mV increments. This  
77 protocol is depicted in Figure 5A (right column).

## 78 **Protocol 6 — Action Potentials Clamp**

79 See main text.

## 80 **Protocol 7 — Sinusoidal Clamp**

81 The full protocol is comprised of  $250$  ms at holding potential of  $-80$  mV, followed by a  $50$  ms ‘leak  
82 detection’ step to  $-120$  mV, and then  $200$  ms back at  $-80$  mV. This was followed by an ‘activation’  
83 step of  $1$  s step to  $40$  mV; a ‘closing’  $500$  ms step to  $-120$  mV; and a return to  $-80$  mV for  $1$  second.  
84 The  $3.5$  s sinusoidal portion of the protocol then followed (the form of which is described below),  
85 before a ‘closing’  $500$  ms step to  $-120$  mV, and a return to  $-80$  mV for  $1$  s.

The sinusoidal portion of the protocol takes the form of a sum of three sine waves as discussed  
in the main text Equation (1), and repeated here for convenience:

$$V(t) = -30 + A_1 \sin(\omega_1(t - t_0)) + A_2 \sin(\omega_2(t - t_0)) + A_3 \sin(\omega_3(t - t_0)),$$

86 where  $A_1 = 54$  mV,  $A_2 = 26$  mV,  $A_3 = 10$  mV,  $\omega_1 = 0.007$  ms $^{-1}$ ,  $\omega_2 = 0.037$  ms $^{-1}$  and  $\omega_3 =$   
87  $0.19$  ms $^{-1}$ , and  $t$  is time measured in milliseconds.

88 The protocol was initially designed with just the  $-120$  mV leak step and not the additional  
89 ‘activation’ steps to  $40$  mV and  $-120$  mV (which were included after preliminary experiments as  
90 described in Section B2.2) and so the sine wave was shifted using  $t_0 = 2500$  ms to begin at the same  
91 phase after we incorporated the additional steps. This offset is not expected to be important to  
92 include, but was included here for clarity for anyone attempting to reproduce our study.

## 93 **B1.5 Liquid Junction Potential**

94 All of the protocols described in this section were adjusted on the amplifier to account for the liquid  
95 junction potential which was calculated to be  $4.1$  mV from the ionic composition of our physiological  
96 solutions which are described in Section B1.2. The liquid junction potential was calculated using  
97 the junction potential calculator in the pClamp software.

## 98 **B1.6 Effect of Dofetilide Subtraction**

99 To show the effect of  $0.3$   $\mu$ M dofetilide subtraction and to demonstrate the lack of endogenous  
100 currents remaining following this step, we compare the current traces before and after dofetilide  
101 subtraction in Figure B5. We show currents from Cell #5 which features in the figures of the main  
102 text.

103 There was little contribution from endogenous currents in these cells. The application of  $0.3$   $\mu$ M  
104 dofetilide eliminates almost all current, indicating that both the vehicle recording and ‘dofetilide  
105 subtracted’ currents are almost entirely due to hERG. While levels of endogenous currents and the  
106 impact of leak subtraction on the current traces may vary from cell-to-cell, overall we found only  
107 small endogenous currents were observed in the cells.

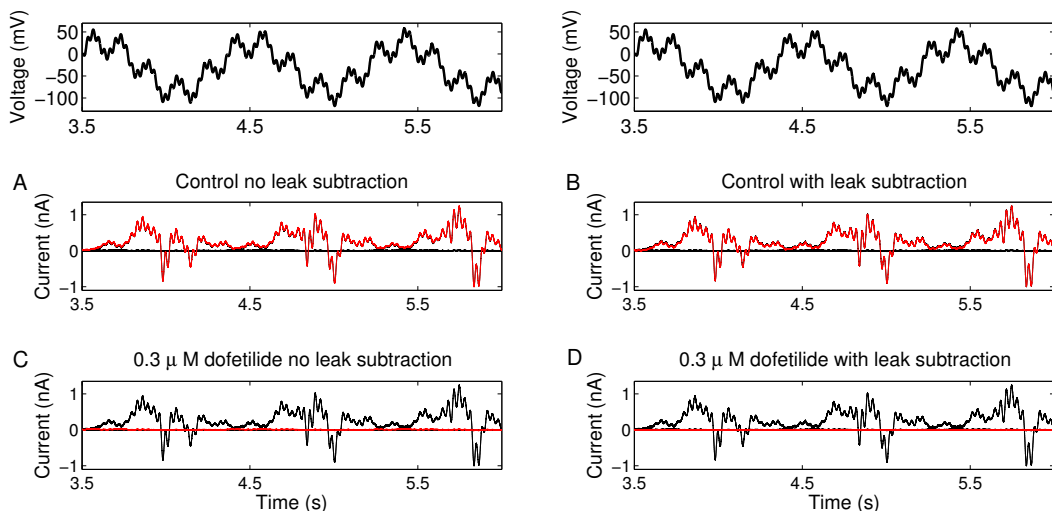

Figure B5: Raw recordings, recordings with leak subtraction, and  $0.3 \mu\text{M}$  dofetilide controls for Cell #5. Top row: input voltage trace from the sine wave protocol (same on both sides for comparison with traces below). In A–D we show the current in response to this voltage protocol in four situations — each panel shows the same four traces, with a different one highlighted in red. In A we highlight the raw recording of whole current; in B the whole current recording after leak subtraction, in C the raw recording after the addition of dofetilide; and in D the dofetilide recording after leak subtraction.

108 An example of where dofetilide subtraction may play a more important role is shown in Fig-  
 109 ure B6, where the hERG current is much lower and so any contribution from endogenous currents  
 110 would have more impact and it may be important to remove this contribution. This example is for  
 111 Cell #6 from the main text.

## 112 B1.7 Deriving IV Curves and Time Constant-V Curves

113 To derive time constant-voltage relationships from experimental data and simulated data traces,  
 114 we used the Levenberg-Marquardt algorithm with a tolerance of  $10^{-6}$  within Clampfit v10.5. To  
 115 derive the instantaneous inactivation time constant curves shown in Figure 5 (inactivation column,  
 116 row D) we fitted a single exponential to the current responses during the  $150 \text{ ms } V_{step}$ , as  
 117 defined in the inactivation protocol (Pr4) description above.

118 To produce the deactivation and recovery from inactivation rate time constant-voltage relation-  
 119 ship for the experimental data traces, we fitted a triple exponential through the experimental data  
 120 trace from the deactivation protocol (Pr 5). The section of the data used for fitting is the current  
 121 in response to the 6 second  $V_{step}$ . Both this region of experimental data used for fitting and that  
 122 for the instantaneous inactivation time constant described above are highlighted in row B of Figure  
 123 5. The fastest time constant from the triple exponential fit to each test step corresponded to the  
 124 recovery from inactivation time constant. We then used the weights of the remaining two time con-  
 125 stants from each triple exponential fit to produce a single weighted time constant for deactivation  
 126 (Lacroix et al., 2011). To derive the deactivation and recovery from inactivation time constants  
 127 from simulated data we fitted a double exponential through the current in response to the 6 second

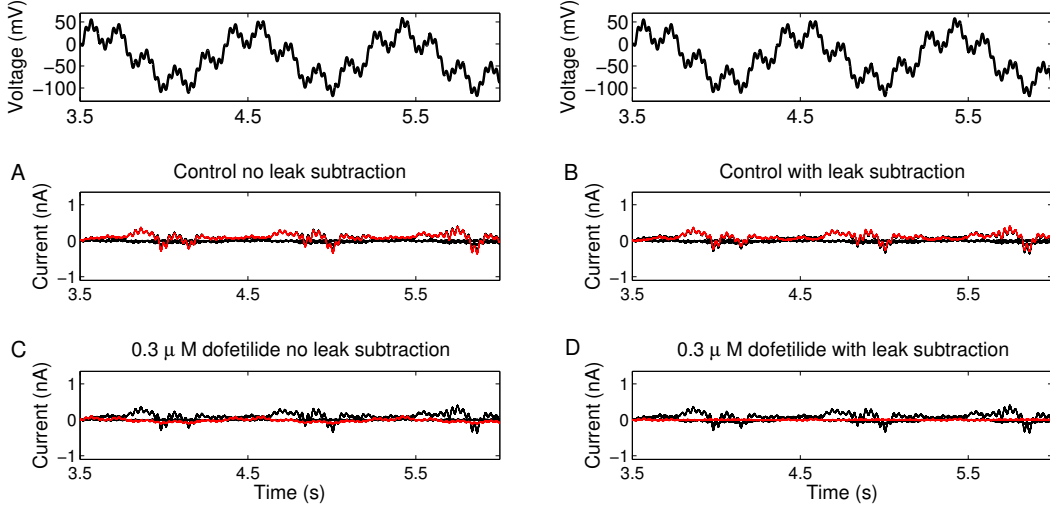

Figure B6: Raw recordings, recordings with leak subtraction, and  $0.3 \mu\text{M}$  dofetilide controls for Cell #6. Top row: input voltage trace from the sine wave protocol (same on both sides for comparison with traces below). In A–D we show the current in response to this voltage protocol in four situations — each panel shows the same four traces, with a different one highlighted in red. In A we highlight the raw recording of whole current; in B the whole current recording after leak subtraction, in C the raw recording after the addition of dofetilide; and in D the dofetilide recording after leak subtraction.

128  $V_{step}$  section of the deactivation protocol. Again, we used the faster time constant as the recovery  
 129 from inactivation time constant and the slower time constant as that for deactivation.

130 To produce the peak current-voltage relationship for the steady state activation protocol for the  
 131 simulated data traces we wrote MatLab code to identify the peak current in the region between  
 132 5.6292 and 5.7292 seconds on each sweep of the protocol, which corresponds to the current response  
 133 just after the 5 second  $V_{step}$  when the voltage is stepped to  $-40$  mV. We then normalised the peak  
 134 current data to the maximum overall peak identified in this region to produce the current-voltage  
 135 relationship curve. For the simulated data we wrote a MatLab script (included in code download)  
 136 to identify the peak-current voltage relationship for this protocol but for the experimental traces  
 137 we verified these peak points manually to avoid incorrect peaks being identified due to noise or  
 138 capacitive effects. We also identified the peak currents in the currents evoked by the activation  
 139 kinetics protocols manually for the same reason. In the activation kinetics protocol we identified  
 140 the peak currents during the  $V_{step}$  for each interval of  $T_{step}$  duration.

## 141 B2 Bayesian Inference Scheme

### 142 B2.1 Likelihood formulation

143 For an observed experimental recording which we will denote  $\mathbf{y}$ , we can infer the probability of dif-  
 144 ferent combinations of model parameters  $\theta$ . Bayes' rule underpins this approach which is expressed  
 145 as

$$P(\theta|\mathbf{y}) = \frac{P(\mathbf{y}|\theta)P(\theta)}{P(\mathbf{y})} \quad (\text{B.1})$$



146  $P(\theta|\mathbf{y})$  is a probability density that encodes our belief that the parameters of the model are in a  
 147 neighbourhood of  $\theta$  after observing the experimental data  $\mathbf{y}$ , and is termed the *posterior probability*  
 148 *density*.  $P(\mathbf{y}|\theta)$  is the probability density that corresponds to the probabilistic generation of the  
 149 experimental data  $\mathbf{y}$  given a model parameterised with parameters  $\theta$ .  $P(\theta)$  encapsulates our beliefs  
 150 about  $\theta$  before observing any experimental data and is termed the *prior distribution* (details of  
 151 the prior that we used are in Appendix B2.3).  $P(\mathbf{y})$  is a normalising term which is the integral of  
 152 all possible probabilities  $P(\mathbf{y}|\theta)$  and ensures that the posterior density  $P(\theta|\mathbf{y})$  integrates to 1. In  
 153 practice this normalising term is calculated by

$$P(\mathbf{y}) = \int P(\mathbf{y}|\theta)P(\theta)d\theta. \quad (\text{B.2})$$

154 A Bayesian inference approach to parameter estimation combines beliefs about the parameters in the  
 155 prior distribution  $P(\theta)$  with the *likelihood*  $P(\mathbf{y}|\theta)$  to determine the posterior probability distribution  
 156  $P(\theta|\mathbf{y})$ .

157 We define the likelihood

$$L(\theta|\mathbf{y}) = P(\mathbf{y}|\theta) \quad (\text{B.3})$$

158 to insist on the fact that we consider it as a function of  $\theta$ , with  $\mathbf{y}$  kept fixed at the observation  
 159 values. Bayes' rule (in Equation (B.1)) can be rewritten in terms of likelihood as

$$P(\theta|\mathbf{y}) \propto P(\theta)L(\theta|\mathbf{y}). \quad (\text{B.4})$$

160 When the prior distribution is assumed to be uniform (as it is in this study), we can make inferences  
 161 based on just the likelihood, as the prior  $P(\theta)$  is either constant or zero. If a proposed parameter  
 162 is outside our chosen prior then likelihood is 0 and we simply record that this parameter set has a  
 163 likelihood of 0 and propose another parameter set.

164 We assume that the errors at each time point are independent and so the conditional probability  
 165 density of observing the whole experimental trace from time sample 0 to time sample  $T$  given the  
 166 model parameter set  $\theta$  is

$$L(\theta|\mathbf{y}) = \prod_{t=0}^T P(y_t|\theta). \quad (\text{B.5})$$

167 We assume that the experimental noise is independently and normally distributed with a mean  
 168 of zero and variance of  $\sigma^2$ . The likelihood is then expressed as

$$L(\theta|\mathbf{y}) = \prod_{t=0}^T \mathcal{N}(y_t|f_t(\theta), \sigma^2) = \prod_{t=0}^T \frac{1}{\sqrt{2\pi\sigma^2}} \exp\left(-\frac{(y_t - f_t(\theta))^2}{2\sigma^2}\right). \quad (\text{B.6})$$

169 In our case  $f_t(\theta)$  is the predicted current at each time point given the parameters, this is given  
 170 by equation (7) after solving the model system (equations (3)–(6)). Calculating equation (B.6)  
 171 requires the evaluation of the product of many numbers less than 1, so it is more numerically  
 172 convenient to calculate the *log-likelihood* instead. As our aim is to identify parameter sets  $\theta$  which  
 173 maximise the likelihood in equation (B.6), maximising the likelihood is equivalent to maximising  
 174 the log-likelihood:

$$\log(L(\theta|\mathbf{y})) = -\frac{1}{2} \sum_{t=0}^T \log(2\pi\sigma^2) - \frac{1}{2} \sum_{t=0}^T \frac{(y_t - f_t(\theta))^2}{\sigma^2}. \quad (\text{B.7})$$

175 In practice, the sums over time in equation (B.7) are formulated so that we exclude time points  
 176 from regions where the data are affected by capacitive spikes. To be precise, we exclude 5 ms

177 intervals following step-changes in the imposed voltage clamp. In the sine wave protocol (Pr7) these  
178 step-changes occur at 0.25 seconds, 0.3 seconds, 0.5 seconds, 1.5 seconds, 2 seconds, 3 seconds, 6.5  
179 seconds and 7 seconds (spikes are seen in experimental recordings at these times in Figure 3).

## 180 **B2.2 Conductance estimation to inform the prior**

181 Preliminary work revealed that using sine wave protocols alone often allowed kinetic parameters in  
182 the hERG model to be recovered, but there was potential for identifiability problems (or at least  
183 we encountered difficulties in finding a global optimum due to a rugged likelihood surface) when  
184 simultaneously fitting the conductance parameter and transition rate parameters  $P_1$  to  $P_8$  (although  
185 previous work suggests all parameters are theoretically identifiable (Walch and Eisenberg, 2016)).  
186 To add extra information on conductance, we incorporated a voltage-step to +40 mV followed by a  
187 step down to -120 mV, as described in the definition of the sinusoidal protocol above. The aim being  
188 to provoke a large current. We then fitted a single exponential through the slow time constant of  
189 the tail current exhibited during the -120 mV step (fitting was performed in the Clampfit software,  
190 using the Levenberg-Marquardt algorithm with a tolerance of  $10^{-6}$ ). We then extrapolated back to  
191 the point at which the voltage step to -120 mV was made, and used the extrapolated current value  
192 at this point to estimate a conductance at this time point (this extrapolation method is described  
193 in Vandenberg et al. (2012)). The conductance we estimated was used as a lower bound for the  
194 prior distribution of the conductance, as we describe below.

## 195 **B2.3 Prior**

196 In this section we describe our prior assumptions on the values that each model parameter can take.  
197 The prior for the conductance  $G_{Kr}$  is assumed to be independent of the kinetic parameters, and to  
198 take a uniform distribution. As discussed above, the lower bound is formed by estimating a lower  
199 bound on the conductance value ‘directly’ from the experimental data; the upper bound is assumed  
200 to be 10 times the value of the lower bound.

201 The other model parameters are within transition rates of the form

$$k = A \exp(BV), \tag{B.8}$$

202 where  $V$  is voltage and  $A$  and  $B$  are model parameters ( $P_1$  to  $P_8$  for  $k_1$  to  $k_4$ , as shown in Figure 4).

203 For parameters of the form  $A$  we assumed that the prior distribution is uniform between  $10^{-7}$   
204 and  $1000 \text{ ms}^{-1}$ , again to cover (and extend beyond) the full physiological range expected with hERG  
205 channel gating.

206 We assume that the prior distributions for  $B$  parameters are uniform between  $10^{-7}$  and  $0.4$   
207  $\text{mV}^{-1}$ . The lower bound for this parameter was selected as the voltage-dependence becomes prac-  
208 tically redundant when  $B$  becomes small: when  $B = 10^{-7}$  the value of  $\exp(BV)$  will change by less  
209 than 0.0015% across the voltages we reach in this study. The upper value is beyond the physiolog-  
210 ically expected range.

211 We also impose a prior on the maximum rate of transition  $k$  between any states (maximum  
212 across the full voltage range in the protocol (that is from -120 to 58.25 mV)). If the maximum  
213 rate  $k$  is greater than  $1000 \text{ ms}^{-1}$ , or less than  $1.67 \times 10^{-5} \text{ ms}^{-1}$ , the pair of parameter values that  
214 give rise to this are assigned prior probability zero (strictly, this is equivalent to defining 2D prior  
215 on  $A$  and  $B$ , but is easier to describe here, and code, as an additional constraint): the lower bound  
216 is based on the assumption that a transition is not physiologically realistic if it occurs over a time  
217 scale slower than one minute; the upper bound was decided based on the prior for the individual

218 parameters  $A$  and  $B$  in the transition rate expression and to prevent the transitions occurring over  
219 a time scale much faster than would be physiologically expected.

220 Note that our analysis is relatively insensitive to the precise form of the prior that is used as  
221 there are around 80,000 data points (8 s of 10 kHz samples) in the likelihood product calculation of  
222 Equation (B.5), which is then also in a product with the prior in Equation (B.4). So, effectively,  
223 each of the 10,000 data points has the same impact as the prior does on the posterior. Given  
224 our likelihood is extremely peaked around its maximum (Figure 4C), we have observed no notable  
225 influence of the shape of the prior, as long as the maximum posterior density point is well away from  
226 the limits described above — which it has been in all cases. Note that the same concept means  
227 that, in our case, the “maximum likelihood estimate” (MLE — parameter set that maximises  
228 Equation (B.5)) would be practically indistinguishable from the “maximum a posteriori estimator”  
229 (MAP — parameter set that maximises Equation (B.4)) even if we had a non-uniform prior.

## 230 **B2.4 Global minimisation**

231 The Covariance Matrix Adaptation — Evolution Strategy (CMA-ES) algorithm was used to perform  
232 an initial exploration of the surface of the posterior density, and to identify parameter sets which  
233 allow the model to fit the experimental data well. The tolerance used is  $10^{-4}$  and all other settings  
234 are the defaults in MatLab implementation of CMA-ES v3.61, downloaded from [https://www.lri.](https://www.lri.fr/~hansen/cmaes.m)  
235 [fr/~hansen/cmaes.m](https://www.lri.fr/~hansen/cmaes.m). We imposed bounds based on the prior as we describe above in Section B2.3.

236 We run the CMA-ES algorithm from different starting points and continue to do so until we  
237 identify the same region of parameter space for optimal parameter sets for each experimental data  
238 trace when starting from many different starting points. In this way, we can be confident that we  
239 identify the same region of high likelihood consistently (not simply the first local minimum that is  
240 found), and we have more confidence that this corresponds to the globally optimal likelihood.

241 These initial starting points for the CMA-ES algorithm are sampled from within the prior  
242 defined for each parameter, described in section B2.3. To sample from the prior we simply select  
243 the voltage-dependent transition rate parameters (of the form  $B$  described above) uniformly from  
244 the defined range. The same approach is used to sample the conductance parameter.

245 For the parameters of the form  $A$  above we sample starting points in a logarithmic fashion across  
246 the range of the uniform prior. This approach helps to restrict the initial guesses of parameters to  
247 the region of measurable time scales we imposed by defining the maximum and minimum ranges on  
248 the overall transition rate, as described above. We also run a small selection of starting points with  
249 both  $A$  and  $B$  parameter values sampled uniformly from  $[10^{-7}, 0.1]$  (the range in which most existing  
250 model parameters lie), again to ensure we identify the global optimal solution to the optimisation  
251 problem. We log-transform all parameters within CMA-ES to aid the optimisation process by  
252 making all values similar orders of magnitude.

## 253 **B2.5 Markov Chain Monte Carlo parameter inference**

254 We use *Markov Chain Monte Carlo* (MCMC) methods to explore the posterior probability distri-  
255 bution. The approach we use is the *Metropolis-Hastings* algorithm. In this algorithm, candidate  
256 parameter sets are proposed from a *proposal distribution*  $q(\theta_{\text{cand}}|\theta_i)$  which depends only on the  
257 previously accepted parameter set  $\theta_i$ . We use a multivariate normal distribution as our proposal  
258 distribution. Any candidate parameter set  $\theta_{\text{cand}}$  is compared to the current parameter set  $\theta_i$  by  
259 calculating the ratio of the likelihood of the two parameter sets. The value of the ratio determines  
260 whether or not the proposed parameter set is accepted as part of the MCMC chain. If the can-  
261 didate parameter set has a greater posterior density value than the existing parameter set then

262 it will be added to the Markov chain, that is  $\theta_{i+1} = \theta_{\text{cand}}$ . Otherwise, the parameter set may  
 263 still be accepted with a probability equal to the ratio of likelihood/posterior density values. That  
 264 is, a proposed parameter set generated from a multivariate normal distribution is accepted with  
 265 probability

$$\alpha = \min \left\{ \frac{L(\theta_{\text{cand}}|\mathbf{y})}{L(\theta_i|\mathbf{y})}, 1 \right\}. \quad (\text{B.9})$$

266 Also note that if the proposed parameter set contains any parameters outside the range of the  
 267 prior, or violates any of the conditions on the parameters that we have imposed, the parameter set  
 268 is assigned an acceptance probability of 0 and immediately rejected and the previously accepted  
 269 parameter set is again added to the Markov chain — that is,  $\theta_{i+1} = \theta_i$ .

270 In practice, we use a covariance matrix adaptive version of the Metropolis-Hastings Algorithm  
 271 which helps identify the directions in parameter space which have the highest likelihood values, the  
 272 algorithm is described in Haario et al. (2001). At each iteration of the algorithm, the covariance  
 273 matrix of the multivariate normal distribution is updated and a scalar value is also updated to  
 274 define the width of the distribution. We run our MCMC chains for 250,000 samples and discard  
 275 the first 50,000 samples as ‘burn in’ (for an introduction to MCMC see Gilks et al. (1996)).

## 276 C Synthetic Data Study to Assess Protocol Information Content

277 In order to verify that there was sufficient information within the sinusoidal protocol to parameterise  
278 our model we performed a *synthetic data* study. The aim in such a study is to ascertain whether we  
279 can recover the parameters used in the simulation from a simulated data trace (with added noise  
280 in this case).

### 281 C1 Producing synthetic data

282 In order to produce synthetic data we simulate with some fixed known parameter set. We performed  
283 this with both our best initial parameter set estimate (those parameters in literature HH models),  
284 and also from the parameters we obtained after fitting to the experimental data trace as we present  
285 here (both showed good identifiability). We scale the simulated trace by multiplying by this factor,  
286 so it becomes approximately the same magnitude (in nA) as the experimental trace. We estimated  
287 the typical level of noise from the experimental trace by calculating the standard deviation  $\sigma$  of the  
288 experimental current during the first 200 ms (where the current is around zero at the initial holding  
289 potential of  $-80$  mV). We then generate a synthetic data trace by adding normally distributed noise  
290 with a mean of zero and the standard deviation equal to the noise estimated from the experimental  
291 trace ( $\sim N(0, \sigma^2)$ ) to the conductance-scaled simulated trace. The example we present here uses  
292 the experimental reference trace from Cell #5, featured in much of the manuscript.

### 293 C2 Inferring parameters from synthetic data

294 We then attempt to infer parameters from this synthetic data trace, using the CMA-ES algorithm  
295 followed by MCMC as described in Section 2.5. In Figure C7 we present probability density distri-  
296 butions obtained when using both synthetic and experimental traces. We are able to recover the  
297 original parameters underlying the synthetic trace with high accuracy.

298 The synthetic data study provides us with confidence in the suitability of our protocol for  
299 accurately identifying parameters of the model presented in Figure 4B in the main text, and also  
300 that the parameter inference protocol(s) we are using are suitable for the task. We believe such an  
301 approach should always be used to test whether there is sufficient information in the experimental  
302 data being proposed for calibration of a mathematical model. The test should be performed twice:  
303 before conducting the experiment (with the pre-existing best guess at the parameters); and also after  
304 conducting the experiment (with the new maximum posterior density estimate of the parameters  
305 — as we illustrate in Figure C7).

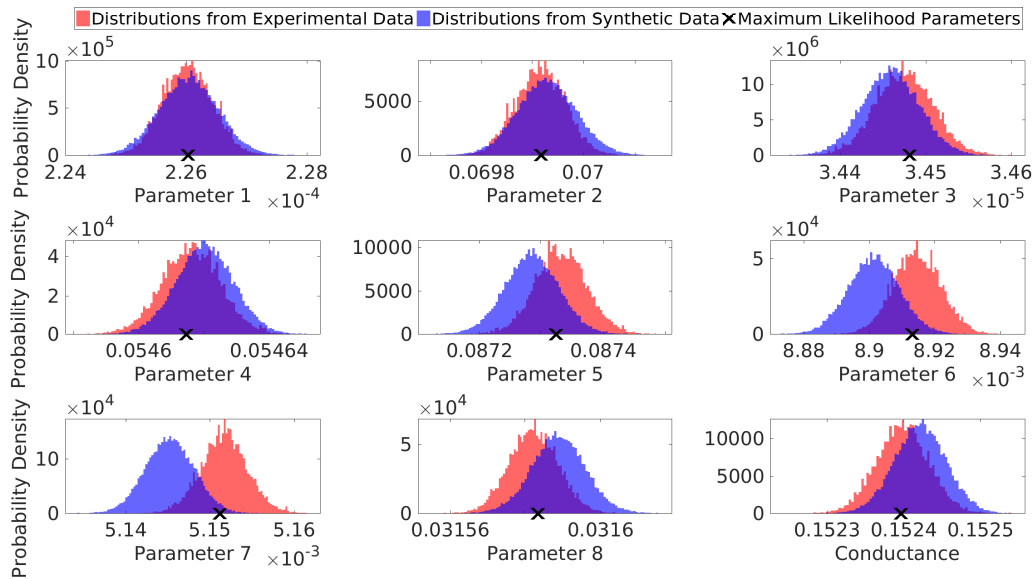

Figure C7: Probability density distributions for each parameter estimates from fitting to both experimental data (red) and simulated data (blue). Crosses indicate the parameter set with the maximum posterior density.

## D Cell-Specific versus Literature Model Predictions

In Tables D2–D10 we compare the predictions given by each cell-specific model with a range of literature model predictions. We compare their ability to predict the full current traces for the validation protocols Pr3–6 discussed in the main text. Each table provides the mean (over each time point) square difference between an experimental current recording in one particular cell and its cell-specific model prediction under each of the validation protocols, and compares this with current predictions from a range of literature models. Equation (F.10) gives the formula that was used to calculate the error entries.

Note that we have to choose a conductance value,  $G_{KR}$ , for the literature models.  $G_{KR}$  is selected differently for each cell by minimising the error metric for the predicted current trace under the action potential protocol (Pr6) for each model (a best-case scenario for each literature model). Our new cell-specific models’ conductances were fitted to the sine wave protocol (Pr7), along with the rest of their parameters. N.B. the literature model predictions are worse if we scale them to fit the sine wave; we considered this perhaps unjustified since they were developed never having seen such a protocol.

Despite literature models having their conductance scaled to minimise error in the Pr6 (action potential clamp) current prediction; only the Di Veroli et al. (2013) model for Cell #9 performs better than our cell-specific models. The sine-wave fitted model outperforms all other literature models for all other cells.

Additionally, the Wang et al. (1997) model gives better predictions for the deactivation protocol current for some cells and for the steady state activation protocol for Cell #4. The Di Veroli et al. (2013) model gives better predictions for the inactivation protocol for Cells #2, and #9; and the deactivation protocol for Cell #6. The Mazhari et al. (2001) model gives a better prediction for the steady state activation protocol for Cell #7.

Table D2: Table quantifying mean square difference (units nA) between experimental current traces and simulation predictions for the validation protocols shown in Figures 5 and 6 for Cell #1. Here the colour scale is set so that  represents zero error and  represents the highest error for each protocol/column.

| Model                      | Sine Wave (Pr7) | AP (Pr6) | Steady Act. (Pr3) | Deact. (Pr5) | Inact. (Pr4) |
|----------------------------|-----------------|----------|-------------------|--------------|--------------|
| New model for Cell #1      | 0.0151          | 0.0283   | 0.0332            | 0.0925       | 0.0312       |
| Wang et al. (1997)         | 0.0389          | 0.0419   | 0.0842            | 0.1195       | 0.0402       |
| Di Veroli et al. (2013)    | 0.0487          | 0.0545   | 0.0916            | 0.1400       | 0.0479       |
| Mazhari et al. (2001)      | 0.0499          | 0.0516   | 0.0731            | 0.1491       | 0.0564       |
| Ten Tusscher et al. (2004) | 0.0599          | 0.0557   | 0.0939            | 0.1538       | 0.0653       |
| Zeng et al. (1995)         | 0.0787          | 0.0802   | 0.0989            | 0.1616       | 0.0638       |

Table D3: Table quantifying mean square difference (units nA) between experimental current traces and simulation predictions for the validation protocols shown in Figures 5 and 6 for Cell #2. Here the colour scale is set so that  represents zero error and  represents the highest error for each protocol/column.

| Model                      | Sine Wave (Pr7) | AP (Pr6) | Steady Act. (Pr3) | Deact. (Pr5) | Inact. (Pr4) |
|----------------------------|-----------------|----------|-------------------|--------------|--------------|
| New model for Cell #2      | 0.0164          | 0.0295   | 0.0270            | 0.0656       | 0.0219       |
| Wang et al. (1997)         | 0.0529          | 0.0528   | 0.0746            | 0.0633       | 0.0384       |
| Di Veroli et al. (2013)    | 0.0314          | 0.0302   | 0.0506            | 0.0679       | 0.0212       |
| Mazhari et al. (2001)      | 0.0361          | 0.0380   | 0.0533            | 0.0939       | 0.0324       |
| Ten Tusscher et al. (2004) | 0.0575          | 0.0639   | 0.0846            | 0.1011       | 0.0539       |
| Zeng et al. (1995)         | 0.0654          | 0.0717   | 0.0828            | 0.1070       | 0.0452       |

Table D4: Table quantifying mean square difference (units nA) between experimental current traces and simulation predictions for the validation protocols shown in Figures 5 and 6 for Cell #3. Here the color scale is set so that  represents zero error and  represents the highest error for each protocol/column.

| Model                      | Sine Wave (Pr7) | AP (Pr6) | Steady Act. (Pr3) | Deact. (Pr5) | Inact. (Pr4) |
|----------------------------|-----------------|----------|-------------------|--------------|--------------|
| New model for Cell #3      | 0.0253          | 0.0415   | 0.0658            | 0.0785       | 0.0537       |
| Wang et al. (1997)         | 0.0472          | 0.0492   | 0.0729            | 0.0648       | 0.0549       |
| Di Veroli et al. (2013)    | 0.0630          | 0.0859   | 0.1136            | 0.1034       | 0.0743       |
| Mazhari et al. (2001)      | 0.0627          | 0.0819   | 0.0910            | 0.1099       | 0.0835       |
| Ten Tusscher et al. (2004) | 0.0733          | 0.0712   | 0.0936            | 0.1101       | 0.0822       |
| Zeng et al. (1995)         | 0.0972          | 0.1153   | 0.1216            | 0.1282       | 0.0868       |

Table D5: Table quantifying mean square difference (units nA) between experimental current traces and simulation predictions for the validation protocols shown in Figures 5 and 6 for Cell #4. Here the color scale is set so that  represents zero error and  represents the highest error for each protocol/column.

| Model                      | Sine Wave (Pr7) | AP (Pr6) | Steady Act. (Pr3) | Deact. (Pr5) | Inact. (Pr4) |
|----------------------------|-----------------|----------|-------------------|--------------|--------------|
| New model for Cell #4      | 0.0258          | 0.0359   | 0.0701            | 0.0878       | 0.0522       |
| Wang et al. (1997)         | 0.0595          | 0.0443   | 0.0587            | 0.0506       | 0.0537       |
| Di Veroli et al. (2013)    | 0.0429          | 0.0559   | 0.1045            | 0.0955       | 0.0596       |
| Mazhari et al. (2001)      | 0.0472          | 0.0581   | 0.0709            | 0.1074       | 0.0681       |
| Ten Tusscher et al. (2004) | 0.0668          | 0.0741   | 0.0760            | 0.1030       | 0.0665       |
| Zeng et al. (1995)         | 0.0832          | 0.1067   | 0.1079            | 0.1282       | 0.0733       |

Table D6: Table quantifying mean square difference (units nA) between experimental current traces and simulation predictions for the validation protocols shown in Figures 5 and 6 for Cell #5. Here the color scale is set so that  represents zero error and  represents the highest error for each protocol/column.

| Model                      | Sine Wave (Pr7) | AP (Pr6) | Steady Act. (Pr3) | Deact. (Pr5) | Inact. (Pr4) |
|----------------------------|-----------------|----------|-------------------|--------------|--------------|
| New model for Cell #5      | 0.0203          | 0.0453   | 0.0437            | 0.1317       | 0.0700       |
| Wang et al. (1997)         | 0.0725          | 0.0764   | 0.1374            | 0.1611       | 0.0933       |
| Di Veroli et al. (2013)    | 0.0675          | 0.0958   | 0.1148            | 0.1881       | 0.0735       |
| Mazhari et al. (2001)      | 0.0824          | 0.0963   | 0.1009            | 0.2286       | 0.1012       |
| Ten Tusscher et al. (2004) | 0.1080          | 0.1260   | 0.1603            | 0.2422       | 0.1415       |
| Zeng et al. (1995)         | 0.1318          | 0.1650   | 0.1620            | 0.2575       | 0.1259       |

Table D7: Table quantifying mean square difference (units nA) between experimental current traces and simulation predictions for the validation protocols shown in Figures 5 and 6 for Cell #6. Here the color scale is set so that  represents zero error and  represents the highest error for each protocol/column.

| Model                      | Sine Wave (Pr7) | AP (Pr6) | Steady Act. (Pr3) | Deact. (Pr5) | Inact. (Pr4) |
|----------------------------|-----------------|----------|-------------------|--------------|--------------|
| New model for Cell #6      | 0.0113          | 0.0216   | 0.0264            | 0.0504       | 0.0170       |
| Wang et al. (1997)         | 0.0263          | 0.0273   | 0.0370            | 0.0299       | 0.0240       |
| Di Veroli et al. (2013)    | 0.0251          | 0.0375   | 0.0379            | 0.0492       | 0.0204       |
| Mazhari et al. (2001)      | 0.0319          | 0.0369   | 0.0324            | 0.0606       | 0.0292       |
| Ten Tusscher et al. (2004) | 0.0409          | 0.0451   | 0.0455            | 0.0603       | 0.0384       |
| Zeng et al. (1995)         | 0.0488          | 0.0644   | 0.0472            | 0.0688       | 0.0342       |



Table D8: Table quantifying mean square difference (units nA) between experimental current traces and simulation predictions for the validation protocols shown in Figures 5 and 6 for Cell #7. Here the color scale is set so that  represents zero error and  represents the highest error for each protocol/column.

| Model                      | Sine Wave (Pr7) | AP (Pr6) | Steady Act. (Pr3) | Deact. (Pr5) | Inact. (Pr4) |
|----------------------------|-----------------|----------|-------------------|--------------|--------------|
| New model for Cell #7      | 0.0495          | 0.0777   | 0.1446            | 0.1824       | 0.0655       |
| Wang et al. (1997)         | 0.1175          | 0.1394   | 0.1743            | 0.1392       | 0.0923       |
| Di Veroli et al. (2013)    | 0.1142          | 0.1541   | 0.2052            | 0.2382       | 0.0960       |
| Mazhari et al. (2001)      | 0.1485          | 0.1628   | 0.1410            | 0.2669       | 0.1303       |
| Ten Tusscher et al. (2004) | 0.1900          | 0.2102   | 0.2237            | 0.2726       | 0.1700       |
| Zeng et al. (1995)         | 0.2121          | 0.2567   | 0.2567            | 0.3177       | 0.1624       |

Table D9: Table quantifying mean square difference (units nA) between experimental current traces and simulation predictions for the validation protocols shown in Figures 5 and 6 for Cell #8. Here the color scale is set so that  represents zero error and  represents the highest error for each protocol/column.

| Model                      | Sine Wave (Pr7) | AP (Pr6) | Steady Act. (Pr3) | Deact. (Pr5) | Inact. (Pr4) |
|----------------------------|-----------------|----------|-------------------|--------------|--------------|
| New model for Cell #8      | 0.0294          | 0.0482   | 0.0551            | 0.0927       | 0.0510       |
| Wang et al. (1997)         | 0.0605          | 0.0625   | 0.1112            | 0.1258       | 0.0626       |
| Di Veroli et al. (2013)    | 0.0542          | 0.0753   | 0.0858            | 0.1415       | 0.0641       |
| Mazhari et al. (2001)      | 0.0700          | 0.0759   | 0.0893            | 0.1717       | 0.0831       |
| Ten Tusscher et al. (2004) | 0.0864          | 0.0940   | 0.1279            | 0.1810       | 0.1013       |
| Zeng et al. (1995)         | 0.0990          | 0.1168   | 0.1324            | 0.1909       | 0.0961       |

Table D10: Table quantifying mean square difference (units nA) between experimental current traces and simulation predictions for the validation protocols shown in Figures 5 and 6 for Cell #9. Here the color scale is set so that  represents zero error and  represents the highest error for each protocol/column.

| Model                      | Sine Wave (Pr7) | AP (Pr6) | Steady Act. (Pr3) | Deact. (Pr5) | Inact. (Pr4) |
|----------------------------|-----------------|----------|-------------------|--------------|--------------|
| New model for Cell #9      | 0.0183          | 0.0314   | 0.0361            | 0.0506       | 0.0294       |
| Wang et al. (1997)         | 0.0300          | 0.0351   | 0.0558            | 0.0483       | 0.0339       |
| Di Veroli et al. (2013)    | 0.0248          | 0.0307   | 0.0374            | 0.0531       | 0.0277       |
| Mazhari et al. (2001)      | 0.0262          | 0.0329   | 0.0407            | 0.0632       | 0.0315       |
| Ten Tusscher et al. (2004) | 0.0358          | 0.0421   | 0.0612            | 0.0673       | 0.0408       |
| Zeng et al. (1995)         | 0.0429          | 0.0470   | 0.0602            | 0.0709       | 0.0364       |

## 330 E Additional Current-Voltage Relationship Predictions

331 Here we show the remainder of the predictions of the current-voltage relationships for the validation  
 332 data of cell 5 that were not included in the main text (the results of Pr1 and Pr2, and extra IV  
 333 curves for Pr4). Figure E8 shows the summary curves for Pr1 (voltage clamp shown in Figure B3)  
 334 and Pr2 (voltage clamp shown in Figure B4).

335 Traditionally these peak current curves would be plotted by normalizing to the peak current  
 336 recorded in each activation kinetics protocol. However, as we have used a shorter version of the  
 337 activation kinetics protocol, we do not expect that the channel would be fully open at the longest  
 338 duration test step in Pr1 and Pr2. We have therefore instead normalized the curves using the peak  
 339 current during the initial deactivation step in the sine wave protocol (around 1.6 seconds) where we  
 340 expect the channel to be maximally open.

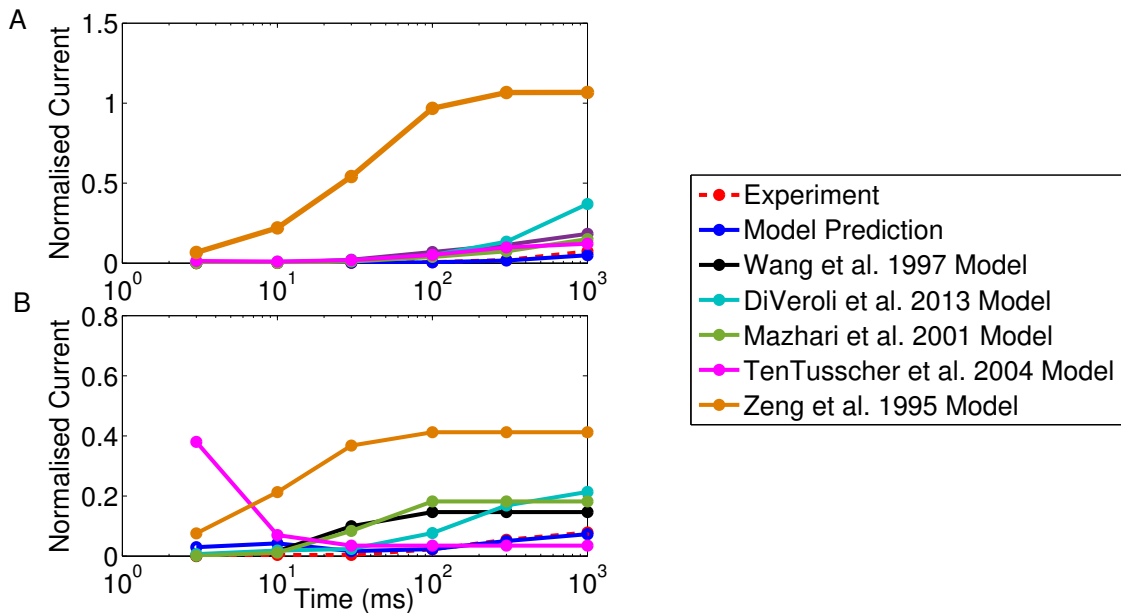

Figure E8: Predictions of peak current-voltage relationship derived from experiment and model predictions in response to; A) Activation Kinetics Pr1, B) Activation Kinetics Pr2, with comparison of our model prediction with predictions from existing literature models. Currents have been normalized to the peak current in the initial deactivation step in the sine wave protocol (around 1.6 seconds) as we do not expect the channel to be fully open at the longest  $T_{step}$  in these activation kinetics protocols.

341 In Figures E9 and E10 we plot additional IV curves summarising the experimental, New Model  
 342 and literature model responses to the inactivation protocol Pr4.

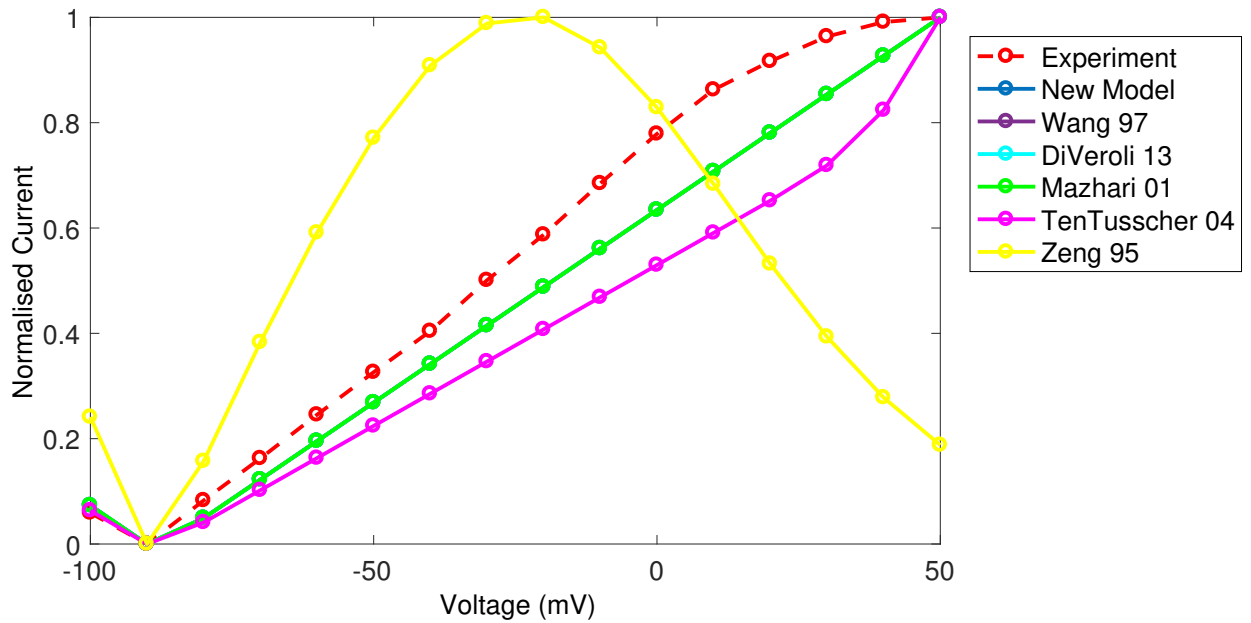

Figure E9: Inactivation peak current IV curve, summarizing currents in response to Pr4. The New Model, Wang, DiVeroli and Mazhari model IV curves are all indistinguishable here and lie on top of one another under the green line.

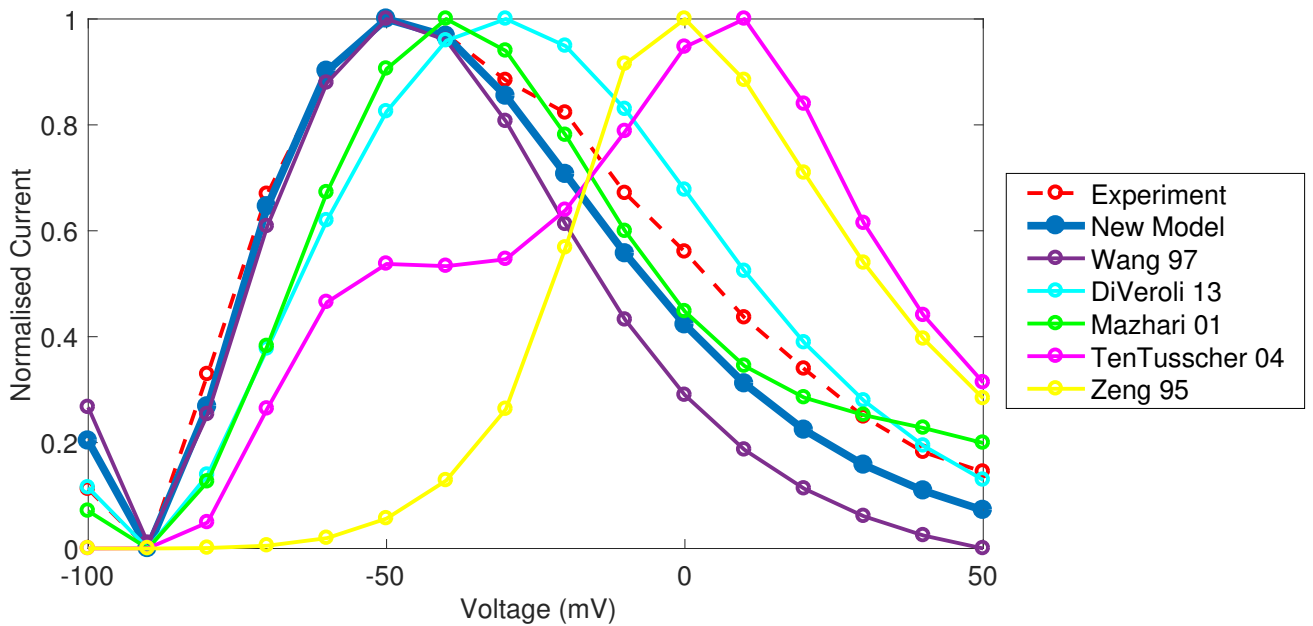

Figure E10: Inactivation steady-state current IV curve, summarizing currents in response to Pr4.

## F Comparing Cell-Specific with Average Model

In addition to creating cell specific models as described so far we also created an averaged model by first normalizing each experimental trace to one reference trace (so that each trace was given equal weight in the averaging regardless of the conductance of the channel) and then summing and averaging the current value at each time point along the protocol.

The parameter values obtained when calibrating each cell-specific and averaged model are shown in Table F11. These values correspond to the parameter sets with maximum posterior density identified in the MCMC chain. The full posterior density distributions for each parameter for each of the 9 cells are shown in Figure F11.

Table F11: Table of parameter values at the maximum posterior density for each cell-specific model, and the model fitted to averaged data (N.B. not the average of the cell-specific parameters). Here the model parameter numberings correspond to those detailed in Figure 4B, and  $G_{Kr}$  represents the conductance value fitted for each model. \*Note that the conductance fitted for the ‘Averaged’ model reflects mainly the conductance for the reference experimental trace (used for scaling all other traces before averaging), and should not be considered the ‘average’ conductance, hence its omission from Figure 7A.

|          | $P_1$                   | $P_2$  | $P_3$                   | $P_4$  | $P_5$  | $P_6$  | $P_7$  | $P_8$  | $G_{Kr}$ |
|----------|-------------------------|--------|-------------------------|--------|--------|--------|--------|--------|----------|
| Cell #1  | $1.9800 \times 10^{-4}$ | 0.0593 | $7.1688 \times 10^{-5}$ | 0.0493 | 0.1048 | 0.0139 | 0.0038 | 0.0360 | 0.1351   |
| Cell #2  | $3.2387 \times 10^{-4}$ | 0.0653 | $7.8195 \times 10^{-5}$ | 0.0497 | 0.0805 | 0.0025 | 0.0049 | 0.0324 | 0.0902   |
| Cell #3  | $4.7771 \times 10^{-4}$ | 0.0661 | $5.1611 \times 10^{-5}$ | 0.0523 | 0.1375 | 0.0094 | 0.0039 | 0.0375 | 0.1011   |
| Cell #4  | $6.7414 \times 10^{-4}$ | 0.0577 | $5.8027 \times 10^{-5}$ | 0.0517 | 0.0893 | 0.0057 | 0.0059 | 0.0324 | 0.0741   |
| Cell #5  | $2.2603 \times 10^{-4}$ | 0.0699 | $3.4481 \times 10^{-5}$ | 0.0546 | 0.0873 | 0.0089 | 0.0052 | 0.0316 | 0.1524   |
| Cell #6  | $6.1840 \times 10^{-4}$ | 0.0658 | $1.2754 \times 10^{-4}$ | 0.0379 | 0.0810 | 0.0165 | 0.0092 | 0.0253 | 0.0218   |
| Cell #7  | $5.4045 \times 10^{-4}$ | 0.0484 | $6.5855 \times 10^{-5}$ | 0.0457 | 0.0627 | 0.0087 | 0.0054 | 0.0318 | 0.1553   |
| Cell #8  | $3.1336 \times 10^{-4}$ | 0.0481 | $5.0647 \times 10^{-5}$ | 0.0491 | 0.0723 | 0.0063 | 0.0060 | 0.0328 | 0.0984   |
| Cell #9  | $5.6194 \times 10^{-4}$ | 0.0433 | $1.2400 \times 10^{-4}$ | 0.0444 | 0.0659 | 0.0028 | 0.0036 | 0.0343 | 0.0514   |
| Averaged | $4.0000 \times 10^{-4}$ | 0.0579 | $6.5092 \times 10^{-5}$ | 0.0487 | 0.0807 | 0.0068 | 0.0052 | 0.0334 | 0.0673*  |

To quantitatively compare the average model predictions and the cell-specific model predictions shown in Figure 7B of the main text we calculated the mean square difference at each point between the average model and the cell-specific models for each cell when predicting the full current trace in response to the steady-state activation protocol. We also repeated this for the deactivation and inactivation protocols and the action potential protocol shown in Figures 5 and 6. The differences for each cell are shown in Table F12 with a comparison between the experimental result and the average model predictions with the cell-specific predictions.

We note that we have ordered the cells in this table (as in Figure 7) according to the percentage change in leak resistance between performing the vehicle and dofetilide repeats of the sine wave voltage protocol used to construct the model. This ordering acts as an estimated ranking for the quality of each recording. The benefit of a cell-specific approach occurs when using the highest quality data for both model construction and validation. We should note that even though in cells #4 and #6 the average model provides the better prediction of the steady-state activation peak current-voltage relationship than the cell-specific model, the cell-specific models are still providing very good predictions in these cases, it is just that the experimental behavior is more like the average model behavior for these cells. We also note that for eight out of the nine cells, the cell-specific model provides a better prediction of the current response to the action potential protocol than the average model, however, in the case where the cell-specific model is worse the difference is only a small amount.

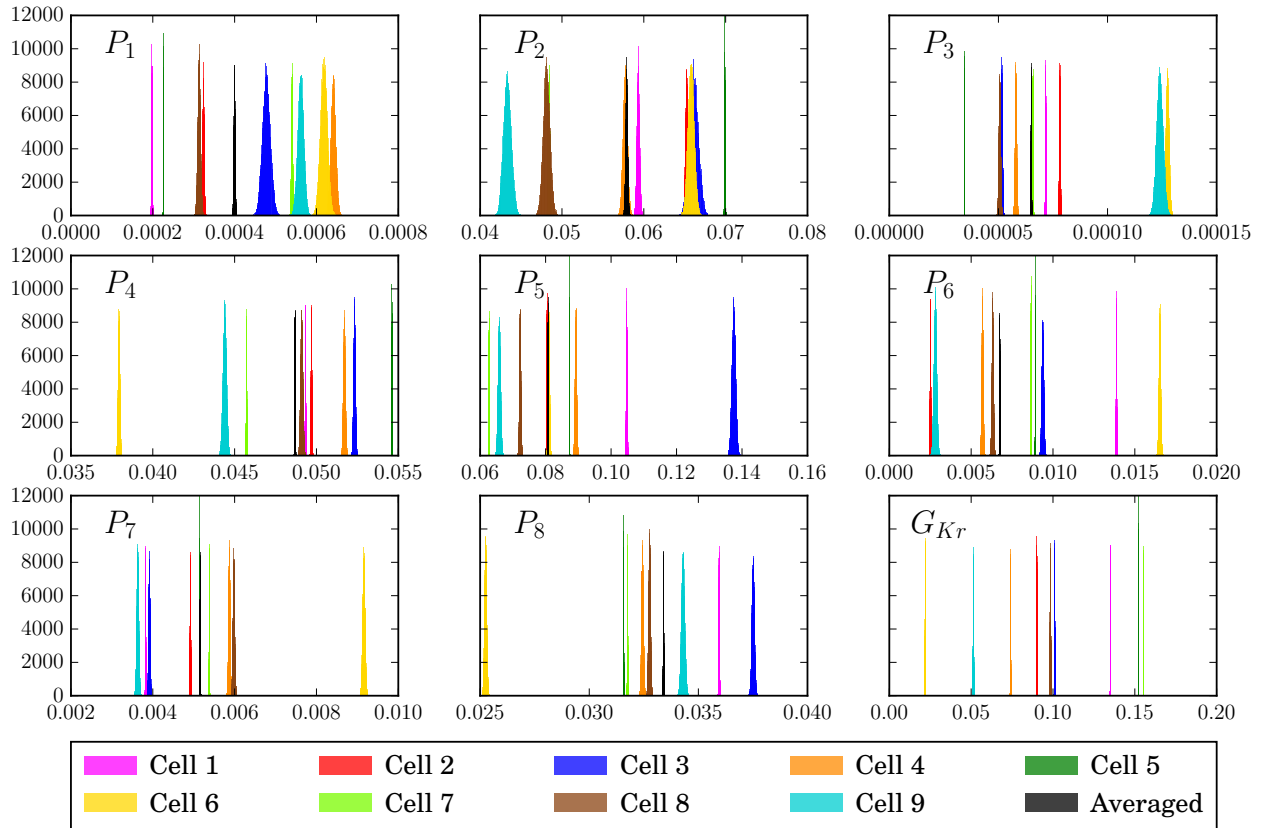

Figure F11: Distributions for each parameter for each of the 9 cell-specific models and the averaged data model. To aid comparison these are all histograms with 100 bars (plotting probability distributions here leads to very different maxima, obscuring the spread information), and so the y-axis is in arbitrary units related to the number of samples. We see that the parameter values tend to be given distinct distributions and so we would consider most of them to be ‘significantly different’, indicating that the variation we see in Figure 7 is due to cell-cell variability in the recordings rather than noise or unidentifiability in our parameter estimates.

371 We use a measure of

$$\text{error} = \frac{1}{T} \sum_{t=1}^T \left( (\text{simulated current at time step } t - \text{experimental current at time step } t)^2 \right)^{\frac{1}{2}}, \quad (\text{F.10})$$

372 to evaluate the error in model predictions for individual cells (using the whole current traces,  
 373 apart from removing regions in the sine wave protocol with capacitive spikes as explained in Meth-  
 374 ods B2.1).

Table F12: Table showing the error measure defined by equation F.10 between cell-specific or average models and the experimental current recording for fit (sine wave Pr7) and predictions with validation protocols (all other columns). Cells are ordered in ascending order according to the percentage change in leak resistance  $R_{leak}$ . Here the color scale is set so that within each pair of columns   represents lowest error and   represents the highest error for each protocol/pair of columns. Note that the cells with larger currents will show larger errors, but the left column cell-specific predictions tend to perform better than the average model, particularly for cells where the average model gives a relatively large error.

| Cell # | $\Delta R_{leak}$ (%) | Sine Wave (Pr 7) |         | APs (Pr 6) |        | Steady Act. (Pr 3) |        | Deact. (Pr 4) |        | Inact. (Pr 5) |        |
|--------|-----------------------|------------------|---------|------------|--------|--------------------|--------|---------------|--------|---------------|--------|
|        |                       | Specific         | Average | Spec.      | Aver.  | Spec.              | Aver.  | Spec.         | Aver.  | Spec.         | Aver.  |
| 1      | 0.0                   | 0.0151           | 0.0367  | 0.0283     | 0.0567 | 0.0332             | 0.0770 | 0.0925        | 0.1138 | 0.0312        | 0.0372 |
| 2      | 7.7                   | 0.0164           | 0.0271  | 0.0295     | 0.0343 | 0.0270             | 0.0334 | 0.0656        | 0.0619 | 0.0219        | 0.0237 |
| 3      | 12.5                  | 0.0253           | 0.0406  | 0.0415     | 0.0681 | 0.0658             | 0.1111 | 0.0785        | 0.0869 | 0.0537        | 0.0731 |
| 4      | 16.7                  | 0.0258           | 0.0318  | 0.0359     | 0.0411 | 0.0701             | 0.0580 | 0.0878        | 0.0846 | 0.0522        | 0.0563 |
| 5      | 20.0                  | 0.0203           | 0.0228  | 0.0453     | 0.0535 | 0.0437             | 0.0591 | 0.1317        | 0.1608 | 0.0700        | 0.0668 |
| 6      | 28.6                  | 0.0113           | 0.0205  | 0.0216     | 0.0250 | 0.0264             | 0.0206 | 0.0504        | 0.0435 | 0.0170        | 0.0183 |
| 7      | 32.5                  | 0.0495           | 0.0631  | 0.0777     | 0.0885 | 0.1446             | 0.1198 | 0.1824        | 0.2016 | 0.0655        | 0.0740 |
| 8      | 42.9                  | 0.0294           | 0.0352  | 0.0482     | 0.0507 | 0.0551             | 0.0603 | 0.0927        | 0.1265 | 0.0510        | 0.0526 |
| 9      | 58.3                  | 0.0183           | 0.0195  | 0.0314     | 0.0306 | 0.0361             | 0.0321 | 0.0506        | 0.0462 | 0.0294        | 0.0294 |

375 For predictions of the action potential protocol currents, Table F12 demonstrates that the cell-  
 376 specific modeling approach yields predictions that are very close to or better than the average model.  
 377 Additionally, for the predictions of the steady-state activation protocol the cell-specific approach  
 378 generally yields very good and more accurate (for 4/5) predictions of validation data when the  
 379 highest quality data is used (cells #1–5). This benefit is absent when lower quality experimental  
 380 data is used where the average model provides very similar, but slightly better, predictions (cells  
 381 #6–9).

382 We also compare cell-specific and average predictions for each of the 9 cells for the deactivation,  
 383 recovery from inactivation and instantaneous inactivation time constants as were shown for one  
 384 cell in Figure 5. We show this comparison for each cell in Figure F12 and F13 for 8/9 cells and in  
 385 Figure F14 for all cells. Cell #6 was omitted in the first two plots because this cell had a particularly  
 386 low current and it was difficult to accurately fit exponential curves to the experimental data for this  
 387 cell. We also note that we have not plotted the time constant values for  $-90$  mV in Figures F12 &  
 388 F13 for the same reason; we could not confidently fit an exponential decay curve to determine an  
 389 accurate time constant value for this voltage step.

390 We see in Figures F12–F14 that the same observations that were made for the results shown in  
 391 Figure 7 generally hold: for lower cell numbers #1–5, we see enhanced predictions of the experi-  
 392 mental time constants from the cell-specific model rather than the averaged model. i.e predictions  
 393 are better in the cells with lower percentage changes in leak current resistance, which correspond

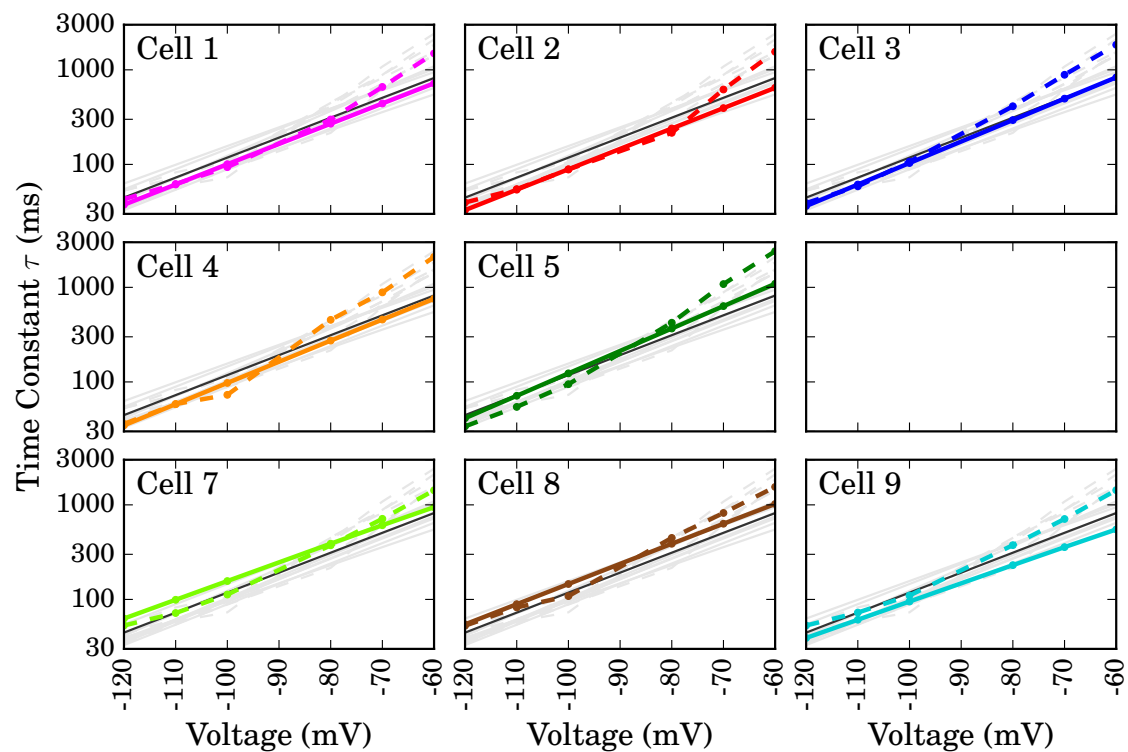

Figure F12: Cell-specific model predictions of time constant/voltage relationships for deactivation (Pr5). Each plot represents a different cell, with cell-specific model prediction depicted by the bold line, and the dashed line showing the cell's experimental data. Black lines on each plot represents the average model prediction. Cells are ordered as in Table F12.

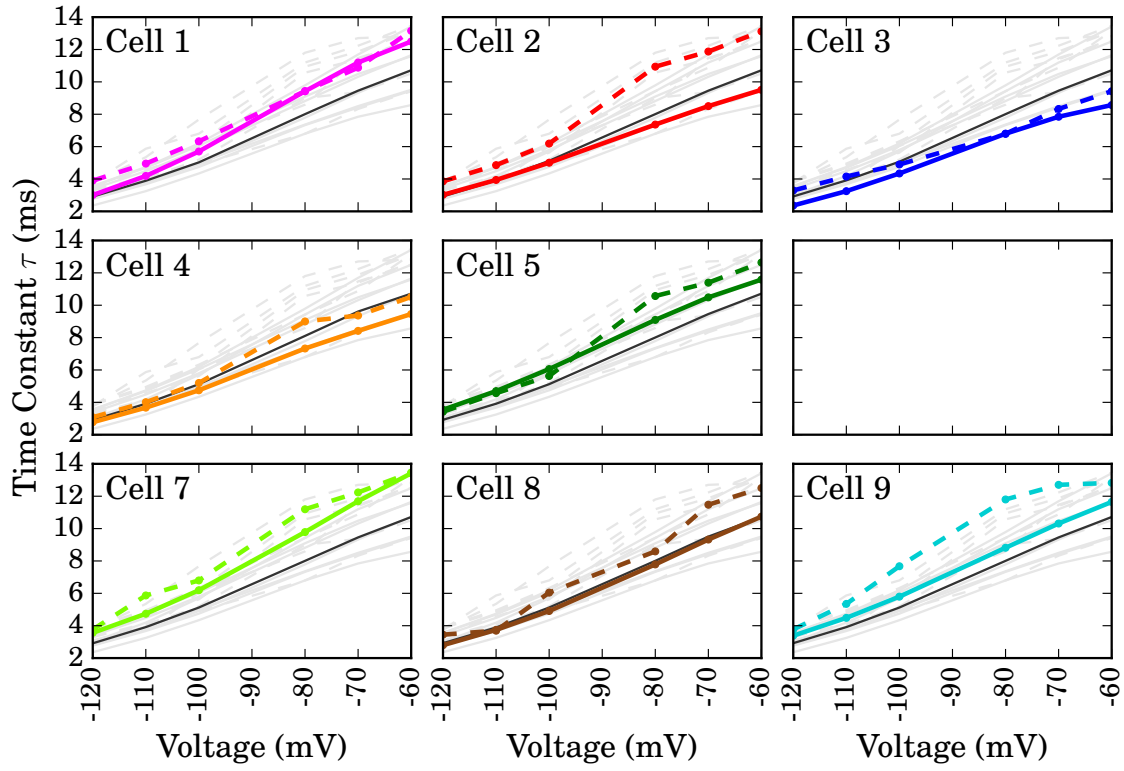

Figure F13: Cell-specific model predictions of time constant/voltage relationships for recovery from inactivation in Pr5. Each plot represents a different cell, with cell-specific model prediction depicted by the bold line, and the dashed line showing the cell's experimental data. Black lines on each plot represents the average model prediction. Cells are ordered as in Table F12.



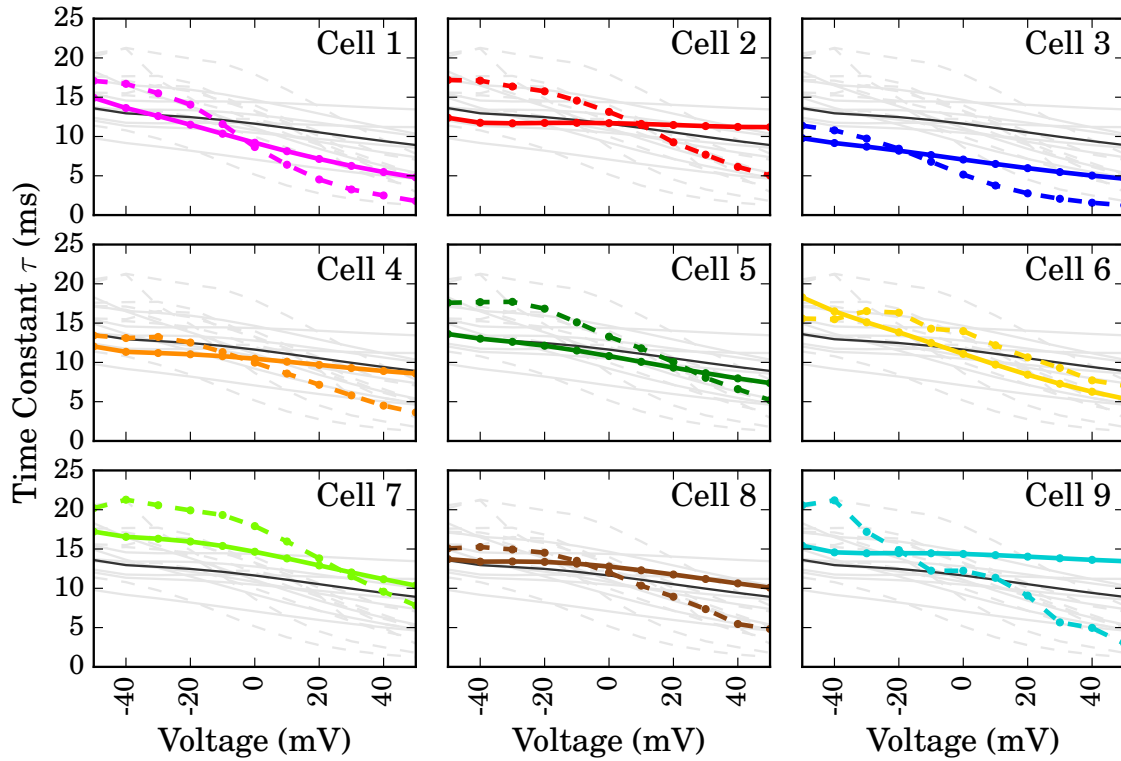

Figure F14: Cell-specific model predictions of time constant/voltage relationships for instantaneous inactivation (Pr4). Each plot represents a different cell, with cell-specific model prediction depicted by the bold line, and the dashed line showing the cell's experimental data. Black lines on each plot represents the average model prediction. Cells are ordered as in Table F12.

394 to better quality data.

## 395 G Synthetic data study for an $I_{Ks}$ model

396 In order to demonstrate the wider applicability of our approach we also show its suitability for  
 397 parameterising a model of a different ion current — the slowly activating delayed rectifier potassium  
 398 channel ( $I_{Ks}$ ). We tested the approach using a synthetic data study similar to that described in  
 399 Section C2 for the model in the main text. The  $I_{Ks}$  model we used was taken from the Ten  
 400 Tusscher et al. (2004) cardiac action potential model which (including a conductance parameter)  
 401 has 8 parameters within the  $I_{Ks}$  model. The model, which we have rewritten to make all parameters  
 402 *a priori* identifiable, takes the form shown in Equations (G.11)–(G.16):

$$I_{Ks} = G_{Ks} X_s^2 (V - E_{Ks}), \quad (\text{G.11})$$

$$X_{s\infty} = \frac{1}{1 + P_1 \exp(-P_2 V)}, \quad (\text{G.12})$$

$$\alpha_{Xs} = \frac{1}{1 + P_6 \exp(P_7 V)}, \quad (\text{G.13})$$

$$\beta_{Xs} = \frac{1}{P_5 \sqrt{1 + P_3 \exp(-P_4 V)}}, \quad (\text{G.14})$$

$$\tau_{Xs} = \alpha_{Xs} \beta_{Xs}, \quad (\text{G.15})$$

$$\frac{dX_s}{dt} = \frac{X_{s\infty} - X_s}{\tau_{Xs}}. \quad (\text{G.16})$$

403 In Table G13 we compare the parameters we used to generate the synthetic data and the  
 404 parameters we identified as producing the best fit to these synthetic data (which included added  
 405 noise). We see that the maximum likelihood parameters are very similar to those from which  
 406 the synthetic data were produced, demonstrating the theoretical capability of this approach to  
 407 parameterise a model of  $I_{Ks}$ . The practicality of this approach with real data is still to be explored.

Table G13: Table comparing parameter values used to simulate the synthetic data for the  $I_{Ks}$  model and the maximum likelihood fit to these data.

|                                 | $P_1$  | $P_2$  | $P_3$  | $P_4$  | $P_5$  | $P_6$  | $P_7$  | $G_{Kr}$ |
|---------------------------------|--------|--------|--------|--------|--------|--------|--------|----------|
| Underlying Synthetic Data Value | 0.6997 | 0.0714 | 0.1889 | 0.1667 | 0.0009 | 0.0498 | 0.05   | 0.1      |
| Fitted Value                    | 0.6967 | 0.0716 | 0.1964 | 0.1659 | 0.0009 | 0.0540 | 0.0486 | 0.0999   |

## H Testing with a five state Markov model

In this section we test whether the sinusoidal protocol is capable of fitting a more complicated model of hERG kinetics with both more states and more parameters. We consider the five state model structure of Wang et al. (1997), as shown in Figure H15B. This model has 14 kinetic parameters, rather than the 8 in our Hodgkin-Huxley style model, we maintain the non-voltage-dependent transition rates between states  $C_2$  and  $C_1$  (states and parameters labelled as depicted in Figure H15B) which was proposed by Wang et al. (1997), which was suggested as the most likely hERG model in Bett et al. (2011). Figure H15A shows the fit to the sinusoidal protocol Pr6 for Cell #5 data (analogous to Figure 4 of the main text).

We see a very good fit to the training protocol with almost all parameters having narrow posterior distributions, as we did with the Hodgkin-Huxley (HH) model. The mean square difference in the fit with this five state model is 0.0164 nA as compared to 0.0203 nA when fitting the HH model (this is no surprise as we expect a model with more parameters to be able to get a closer fit), we can see the main difference is in better fits of the multiple time constants in the response to the ‘closing’ voltage-step at 1.5–2 s and 6.5–7 s.

The only parameter of particular note here is  $P_2$  (the voltage-dependence of the  $C_1$  to O transition), it’s posterior distribution is ‘hitting’ the lower end of the prior, hinting that there may be no/low voltage dependence on this transition. We surmise that either: this voltage-dependence is not required to fit the sinusoidal protocol — there is insufficient information on this parameter revealed by the protocol (although note the posterior is heavily skewed towards zero, not just keeping the same shape as the prior, suggesting there is information and  $P_2$  needs to be small); or the channel really does have little voltage dependence here — perhaps even that the diagram could have a closed state removed and the channel function can be equally well represented with a simpler model.

In Figure H16 we show the predictions of the parameterised five state model for the action potential protocol Pr6, akin to that shown in Figure 6 in the main text. We see that the five state model is quite predictive for this protocol, and has much less error than with its original parameters (shown in purple in panel E and quantified as 0.0764 nA in Table D6 above). Across the whole of Protocol 6 the mean square error for this five state model is slightly less than it was for the new HH model (0.0419 nA vs. 0.0453 nA respectively). We attribute this difference to the better fit of the multiple time constants in the channel closing after 0.73 s, because if we consider just the main action potential section (0.5702–7.3245 seconds of Pr6), the mean square error for five state model is slightly more than the model in the main text (0.0475 nA vs. 0.0471 nA respectively).

The larger structure also makes slightly larger errors when predicting the standard voltage-step protocols, shown in Figure H17 below. We draw attention to the activation, inactivation and recovery from inactivation summary curves, all of which are slightly worse under the five-state model than under the HH model (see Figure 5 of the main text).

Overall, despite an improvement in model fit (comparing Figure H15 in this response with Figure 4 in the main text), we see a slight deterioration in model predictions (a common pitfall when complicating a model, known as “variance bias trade-off” in statistical models), perhaps suggesting we are on the boundary of ‘over-fitting’ in terms of either the number parameters or complexity of the model structure. This finding emphasises the value of a simple model to optimise accuracy in model parameterisation and predictive power. In parallel work, we are exploring and extending the use of this methodology for both parameterising *and selecting* the most representative and predictive model of hERG channel kinetics. The findings here suggest that perhaps a compromise between a structure capable of multiple time constants in closing whilst retaining simplicity may be the most appropriate choice.

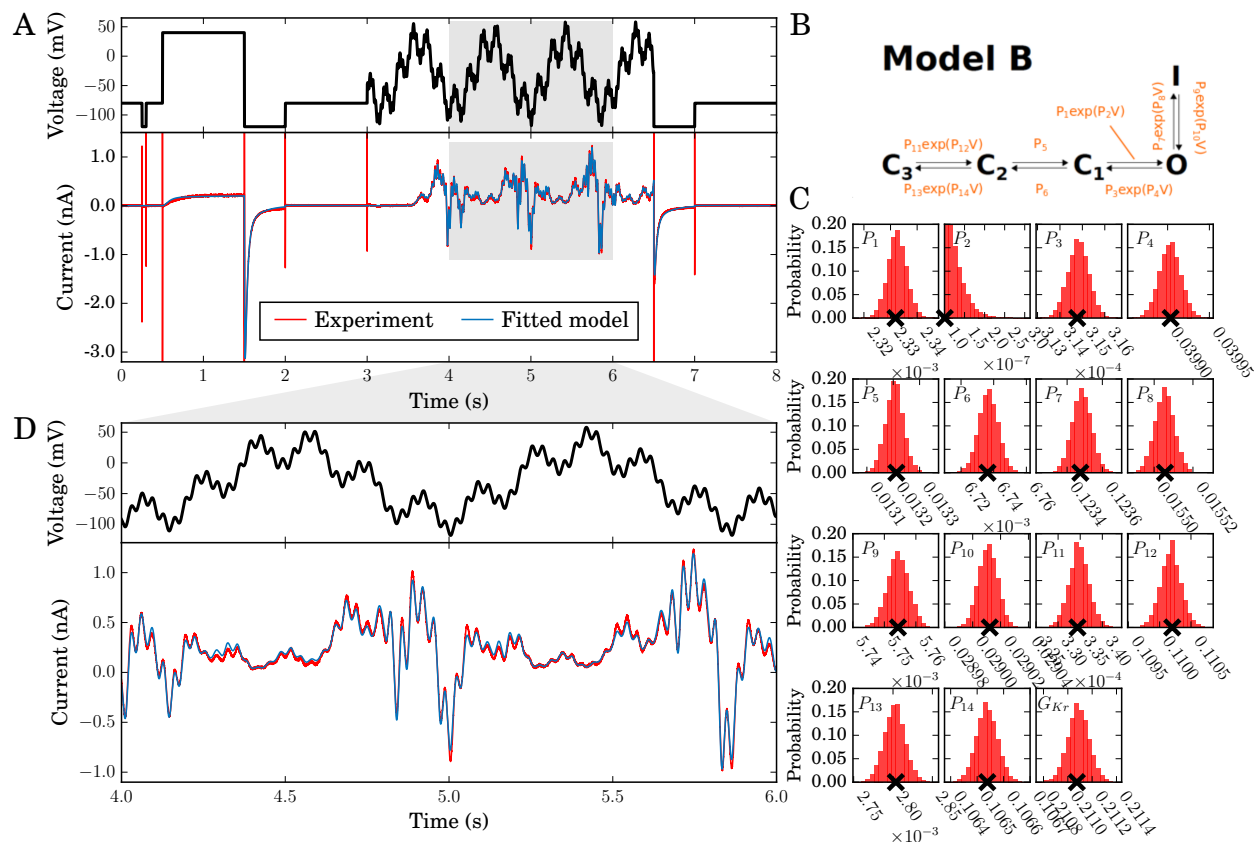

Figure H15: **Model calibration for the five-state model.** For comparison with Figure 4 of the main text. **A:** Top: training protocol, bottom: an experimental recording with the fitted model simulation overlaid. This simulation uses the maximum posterior density parameter set, denoted with crosses in panel C. **B:** The five state model structure in Markov state diagram format. Parameter values  $P_1$  to  $P_{14}$  define transitions between conformational states. The transition between  $C_2$  and  $C_1$  states are assumed to be voltage independent, as in Wang et al. (1997). **C and D:** as per main text Figure 4.

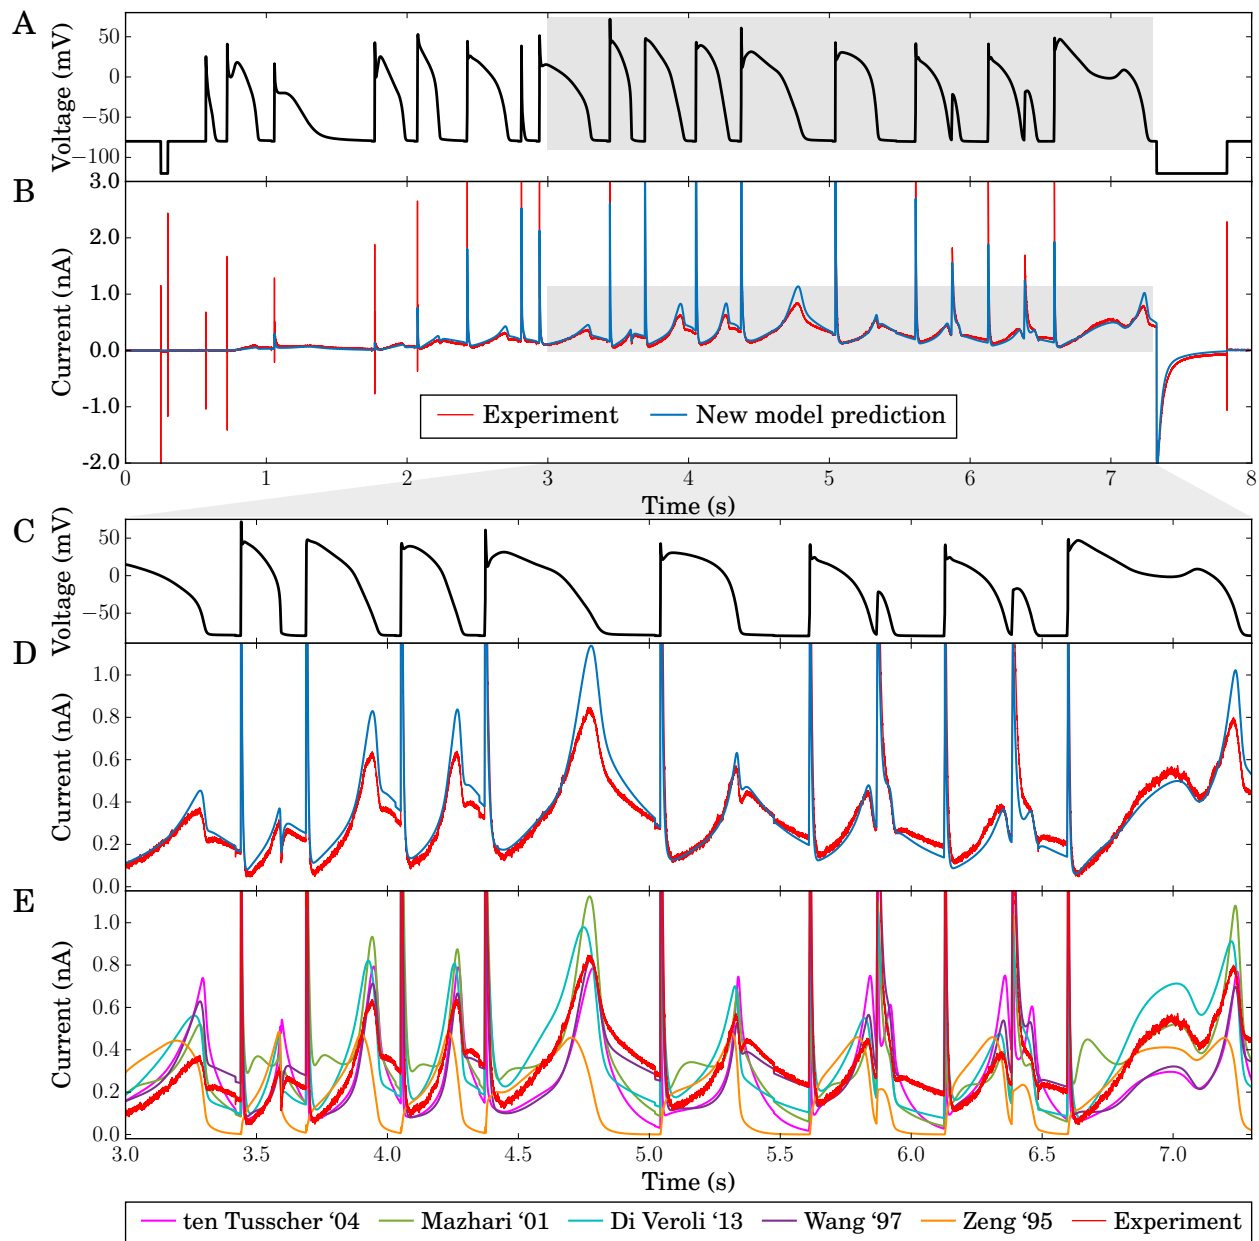

Figure H16: **Validation prediction for the five-state model** — the current in response to the action potential protocol, for comparison with Figure 6 of the main text.

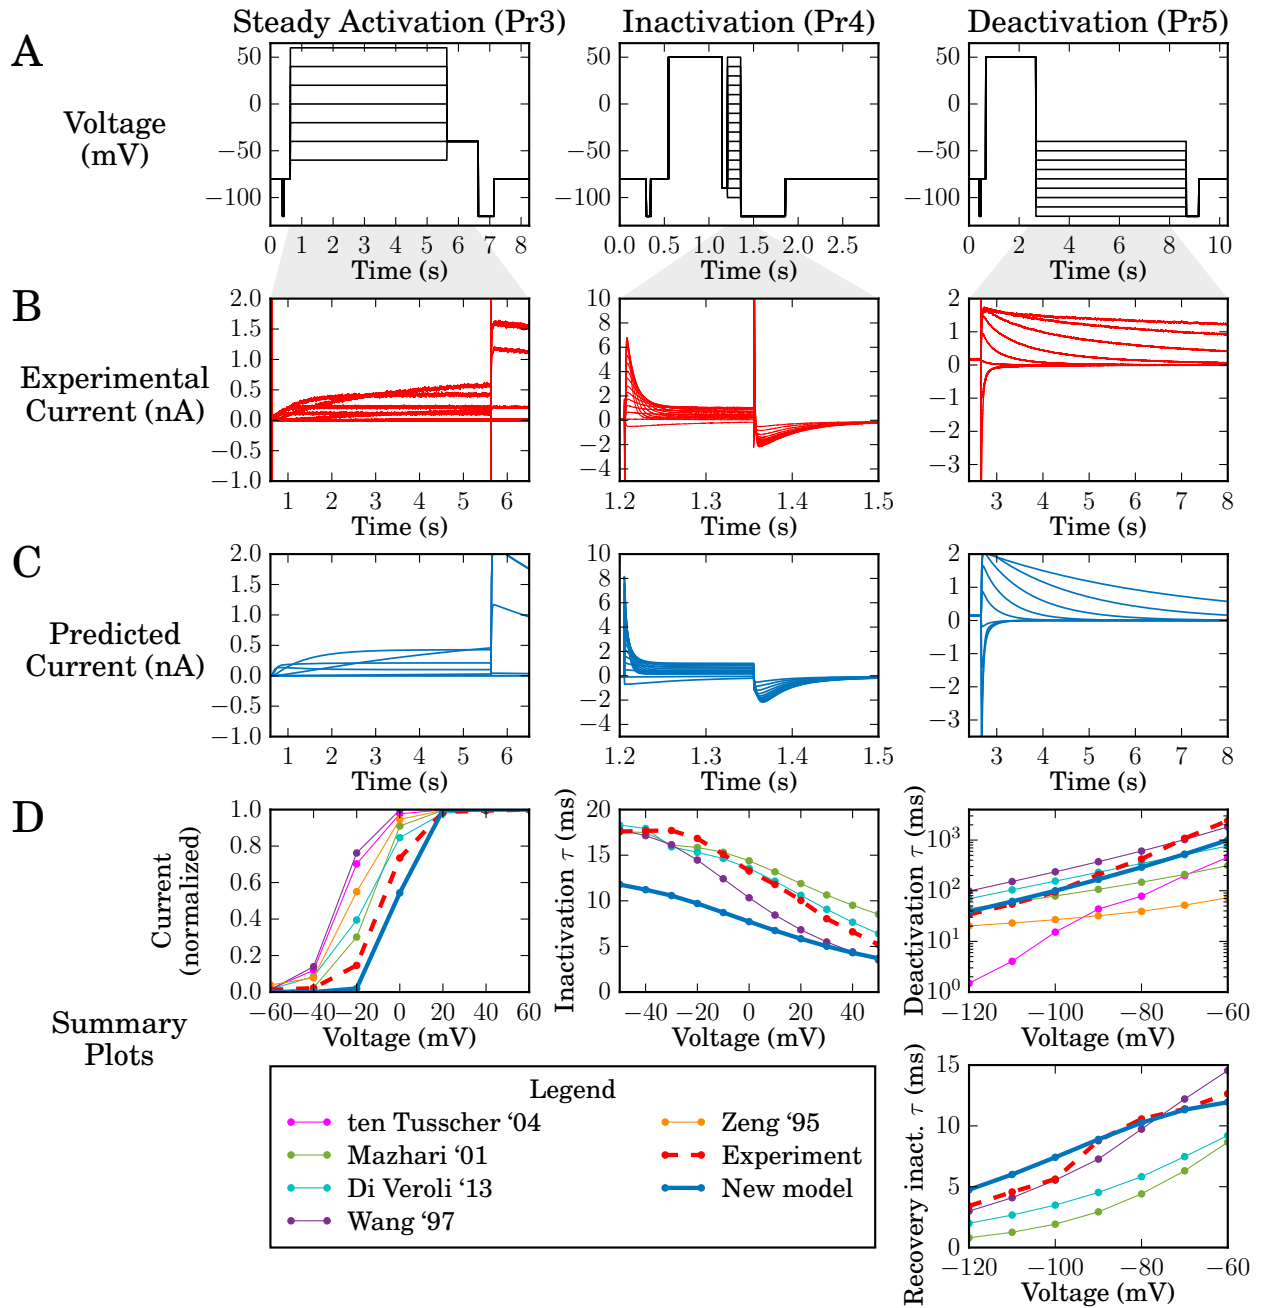

Figure H17: **Validation predictions for the five-state model** — currents in response to traditional voltage step protocols, for comparison with Figure 5 of the main text.

## References

- 455  
456 Aslanidi OV, Stewart P, Boyett MR & Zhang H (2009). Optimal velocity and safety of discontinuous  
457 conduction through the heterogeneous purkinje-ventricular junction. *Biophysical Journal* **97**,  
458 20–39.
- 459 Bett GC, Zhou Q & Rasmusson RL (2011). Models of HERG Gating. *Biophysical Journal* **101**,  
460 631–642.
- 461 Clancy C & Rudy Y (2001). Cellular consequences of HERG mutations in the long QT syndrome:  
462 Precursors to sudden cardiac death. *Cardiovascular Research* **50**, 301–313.
- 463 Courtemanche M, Ramirez R & Nattel S (1998). Ionic mechanisms underlying human atrial action  
464 potential properties: Insights from a mathematical model. *American Journal of Physiology-Heart  
465 and Circulatory Physiology* **275**, H301–H321.
- 466 Di Veroli G, Davies M, Zhang H, Abi-Gerges N & Boyett M (2013). High-throughput screening of  
467 drug-binding dynamics to HERG improves early drug safety assessment. *American Journal of  
468 Physiology-Heart and Circulatory Physiology* **304**, H104–H117.
- 469 Fink M, Noble D, Virag L, Varro A & Giles WR (2008). Contributions of HERG K<sup>+</sup> current to  
470 repolarization of the human ventricular action potential. *Progress in Biophysics and Molecular  
471 Biology* **96**, 357–376.
- 472 Fox JJ, McHarg JL & Gilmour Jr RF (2002). Ionic mechanism of electrical alternans. *American  
473 Journal of Physiology-Heart and Circulatory Physiology* **282**, H516–H530.
- 474 Gilks WR, Richardson S & Spiegelhalter DJ (1996). *Markov Chain Monte Carlo in Practice* London:  
475 Chapman and Hall.
- 476 Grandi E, Pasqualini FS & Bers DM (2010). A novel computational model of the human ventricular  
477 action potential and Ca transient. *Journal of Molecular and Cellular Cardiology* **48**, 112–121.
- 478 Haario H, Saksman E & Tamminen J (2001). An Adaptive Metropolis Algorithm.  
479 *Bernoulli* pp. 223–242.
- 480 Hund TJ & Rudy Y (2004). Rate dependence and regulation of action potential and calcium  
481 transient in a canine cardiac ventricular cell model. *Circulation* **110**, 3168–3174.
- 482 Inada S, Hancox J, Zhang H & Boyett M (2009). One-dimensional mathematical model of the  
483 atrioventricular node including atrio-nodal, nodal, and nodal-his cells. *Biophysical Journal* **97**,  
484 2117–2127.
- 485 Kiehn J, Lacerda A & Brown A (1999). Pathways of HERG inactivation. *American Journal of  
486 Physiology-Heart and Circulatory Physiology* **277**, H199–H210.
- 487 Kurata Y, Hisatome I, Imanishi S & Shibamoto T (2002). Dynamical description of sinoatrial node  
488 pacemaking: improved mathematical model for primary pacemaker cell. *American Journal of  
489 Physiology-Heart and Circulatory Physiology* **283**, H2074–H2101.
- 490 Lacroix JJ, Labro AJ & Bezanilla F (2011). Properties of deactivation gating currents in shaker  
491 channels. *Biophysical Journal* **100**, L28–L30.

- 492 Lindblad D, Murphey C, Clark J & Giles W (1996). A model of the action potential and underlying  
493 membrane currents in a rabbit atrial cell. *American Journal of Physiology* **271**, H1666–H1696.
- 494 Liu S, Rasmusson R, Campbell D, Wang S & Strauss H (1996). Activation and inactivation ki-  
495 netics of an E-4031-sensitive current from single ferret atrial myocytes. *Biophysical Journal* **70**,  
496 2704–2715.
- 497 Lu Y, Mahaut-Smith M, Varghese A, Huang C, Kemp P & Vandenberg J (2001). Effects of prema-  
498 ture stimulation on HERG K<sup>+</sup> channels. *The Journal of Physiology* **537**, 843–851.
- 499 Matsuoka S, Sarai N, Kuratomi S, Ono K & Noma A (2003). Role of individual ionic current systems  
500 in ventricular cells hypothesized by a model study. *The Japanese Journal of Physiology* **53**,  
501 105–123.
- 502 Mazhari R, Greenstein J, Winslow R, Marbán E & Nuss H (2001). Molecular interactions between  
503 two Long-QT syndrome gene products, HERG and KCNE2, rationalized by in vitro and in silico  
504 analysis. *Circulation Research* **89**, 33–38.
- 505 Niederer S, Fink M, Noble D & Smith N (2009). A meta-analysis of cardiac electrophysiology  
506 computational models. *Experimental Physiology* **94**, 486–495.
- 507 Nygren A, Fiset C, Firek L, Clark J, Lindblad D, Clark R & Giles W (1998). Mathematical model  
508 of an adult human atrial cell the role of K<sup>+</sup> currents in repolarization. *Circulation Research* **82**,  
509 63–81.
- 510 Oehmen C, Giles W & Demir S (2002). Mathematical model of the rapidly activating delayed  
511 rectifier potassium current IKr in rabbit sinoatrial node. *Journal of Cardiovascular Electrophys-  
512 iology* **13**, 1131–1140.
- 513 O’Hara T, Virág L, Varró A & Rudy Y (2011). Simulation of the undiseased human cardiac  
514 ventricular action potential: model formulation and experimental validation. *PLoS Computational  
515 Biology* **7**, e1002061.
- 516 Piper D, Varghese A, Sanguinetti M & Tristani-Firouzi M (2003). Gating currents associated with  
517 intramembrane charge displacement in HERG potassium channels. *Proceedings of the National  
518 Academy of Sciences* **100**, 10534.
- 519 Priebe L & Beuckelmann DJ (1998). Simulation study of cellular electric properties in heart failure.  
520 *Circulation Research* **82**, 1206–1223.
- 521 Ramirez RJ, Nattel S & Courtemanche M (2000). Mathematical analysis of canine atrial action  
522 potentials: rate, regional factors, and electrical remodeling. *American Journal of Physiology-  
523 Heart and Circulatory Physiology* **279**, H1767–H1785.
- 524 Seemann G, Sachse FB, WEIB DL & DÖSSEL O (2003). Quantitative reconstruction of cardiac elec-  
525 tromechanics in human myocardium. *Journal of Cardiovascular Electrophysiology* **14**, S219–S228.
- 526 Severi S, Fantini M, Charawi LA & DiFrancesco D (2012). An updated computational model of  
527 rabbit sinoatrial action potential to investigate the mechanisms of heart rate modulation. *The  
528 Journal of Physiology* **590**, 4483–4499.
- 529 Shannon T, Wang F, Puglisi J, Weber C & Bers D (2004). A mathematical treatment of integrated  
530 Ca dynamics within the ventricular myocyte. *Biophysical Journal* **87**, 3351–3371.



- 531 Ten Tusscher K, Noble D, Noble P & Panfilov A (2004). A model for human ventricular tissue.  
532 *American Journal of Physiology-Heart and Circulatory Physiology* **286**, H1573–H1589.
- 533 Vandenberg J, Perry M, Perrin M, Mann S, Ke Y & Hill A (2012). hERG K<sup>+</sup> channels: Structure,  
534 function, and clinical significance. *Physiological Reviews* **92**, 1393–1478.
- 535 Walch OJ & Eisenberg MC (2016). Parameter identifiability and identifiable combinations in gen-  
536 eralized hodgkin–huxley models. *Neurocomputing* **199**, 137–143.
- 537 Wang S, Liu S, Morales M, Strauss H & Rasmusson R (1997). A quantitative analysis of the activa-  
538 tion and inactivation kinetics of HERG expressed in *Xenopus* oocytes. *Journal of Physiology* **502**,  
539 45–60.
- 540 Winslow RL, Rice J, Jafri S, Marban E & O’Rourke B (1999). Mechanisms of altered excitation-  
541 contraction coupling in canine tachycardia-induced heart failure, II Model studies. *Circulation*  
542 *Research* **84**, 571–586.
- 543 Zeng J, Laurita KR, Rosenbaum DS & Rudy Y (1995). Two components of the delayed rectifier  
544 K<sup>+</sup> current in ventricular myocytes of the guinea pig type theoretical formulation and their role  
545 in repolarization. *Circulation Research* **77**, 140–152.
- 546 Zhang H, Holden A, Kodama I, Honjo H, Lei M, Varghese T & Boyett M (2000). Mathematical  
547 models of action potentials in the periphery and center of the rabbit sinoatrial node. *American*  
548 *Journal of Physiology-Heart and Circulatory Physiology* **279**, H397–H421.
